# Supplementary material for: Fluorinated alcohol mediated N,N′-dialkylation of amino acid derivatives via cascade [1,5]-hydride transfer/cyclization for concise synthesis of tetrahydroquinazoline
Source: Royal Society of Chemistry journal article supplement (doi:10.1039/c9ob02498k), 2020-01-01
Supplement: c9ob02498k1.pdf [file c9ob02498k1.pdf]

# Supporting Information

## Fluorinated Alcohol Mediated *N,N'*-Dialkylation of Amino Acid Derivatives via Cascade [1,5]-Hydride Transfer/Cyclization for Concise Synthesis of Tetrahydroquinazoline

Hongjin Shi,<sup>a</sup> Lubin Xu,<sup>a</sup> Didi Ren,<sup>a</sup> Liang Wang,<sup>\*a, b</sup> Weisi Guo<sup>b</sup> and Shuai-shuai  
Li<sup>\* a, b</sup>

<sup>a</sup> College of Chemistry and Pharmaceutical Sciences, Qingdao Agricultural University, Changcheng Rd.  
#700, Qingdao 266109, P. R. China

<sup>b</sup> Shandong Key Laboratory of Biochemical Analysis; College of Chemistry and Molecular Engineering,  
Qingdao University of Science and Technology, Zhengzhou Rd. #53, Qingdao 266042, P. R. China

### Table of Contents

|                                                             |            |
|-------------------------------------------------------------|------------|
| <b>1. General Procedure.....</b>                            | <b>S2</b>  |
| <b>2. <sup>1</sup>H and <sup>13</sup>C NMR Spectra.....</b> | <b>S4</b>  |
| <b>3. Determination of the Stereochemistry.....</b>         | <b>S37</b> |

## 1. General Procedure

### 1.1 Chiral induction with chiral amino acids Experiments

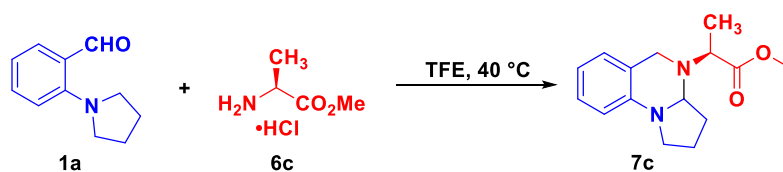

An oven-dried reaction tube was charged with 2-aminobenzaldehyde **1a** (1.0 equiv, 0.1 mmol), trifluoroethanol (TFE) (2 mL) and amino acid ester **6c** (1.5 equiv., 0.15 mmol). The reaction mixture was stirred vigorously at 40 °C and monitored by TLC. After consumption of **1a**, the reaction mixture was concentrated in vacuo and the residue was subjected to flash column chromatography for purification to afford product **7c** in 91% yield with dr = 5:1, and er = 74:26.

### 1.2 Gram-Scale Syntheses

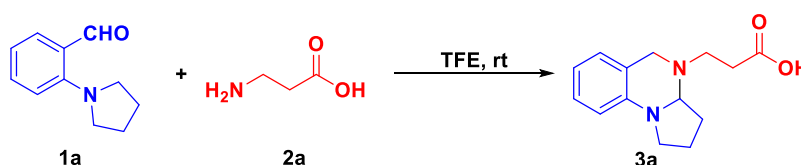

An oven-dried reaction tube was charged with 2-aminobenzaldehyde **1a** (1.0 equiv, 5 mmol), trifluoroethanol (TFE) (100 mL) and β-amino acids **2a** (1.5 equiv., 6.5 mmol). The reaction mixture was stirred vigorously at room temperature and monitored by TLC. After consumption of **1a**, the reaction mixture was concentrated in vacuo and the residue was subjected to flash column chromatography for purification to afford product **3a** in 76% yield (1.16 g).

### 1.3 Control experiments

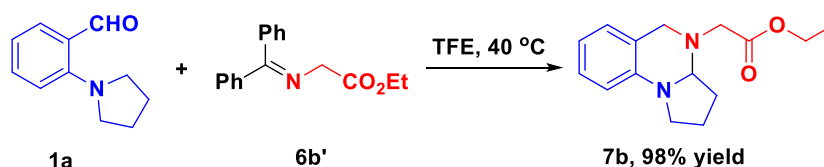

An oven-dried reaction tube was charged with 2-aminobenzaldehyde **1a** (1.0 equiv, 0.1 mmol), trifluoroethanol (TFE) (2 mL) and ethyl 2-((diphenylmethylene)amino)acetate **6b'** (1.5 equiv., 0.15 mmol). The reaction mixture was stirred vigorously at 40 °C and monitored by TLC. After consumption of **1a**, the reaction mixture was concentrated in vacuo and the residue was subjected to by flash column chromatography for purification to afford product **7b** in 98% yield.

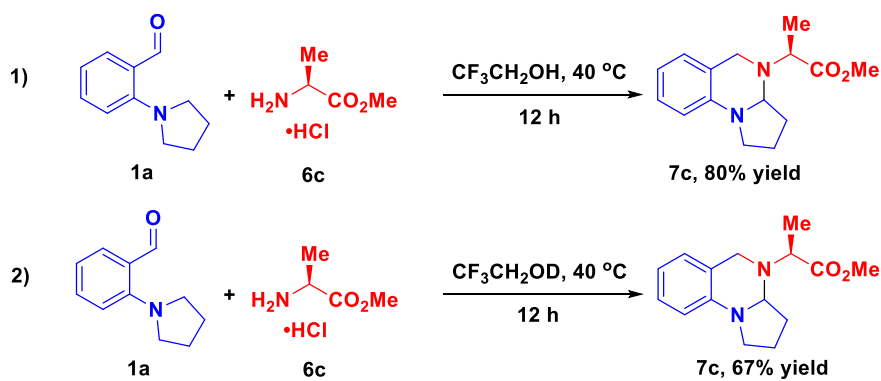

- 1) An oven-dried reaction tube was charged with 2-aminobenzaldehyde **1a** (1.0 equiv., 0.1 mmol), trifluoroethanol (TFE) (2 mL) and amino acid ester **6c** (1.5 equiv., 0.15 mmol). The reaction mixture was stirred vigorously at 40 °C with 12 h. The reaction mixture was concentrated in vacuo and the residue was subjected to by flash column chromatography for purification to afford product **7c** in 80% yield.
- 2) An oven-dried reaction tube was charged with 2-aminobenzaldehyde **1a** (1.0 equiv., 0.1 mmol), trifluoroethane (ol-D) (2 mL) and amino acid ester **6c** (1.5 equiv., 0.15 mmol). The reaction mixture was stirred vigorously at 40 °C with 12 h. The reaction mixture was concentrated in vacuo and the residue was subjected to by flash column chromatography for purification to afford product **7c** in 67% yield.

## 2. <sup>1</sup>H and <sup>13</sup>C NMR Spectra

### 3-(1,2,3,3a-tetrahydropyrrolo[1,2-a]quinazolin-4(5H)-yl)propanoic acid (3a)

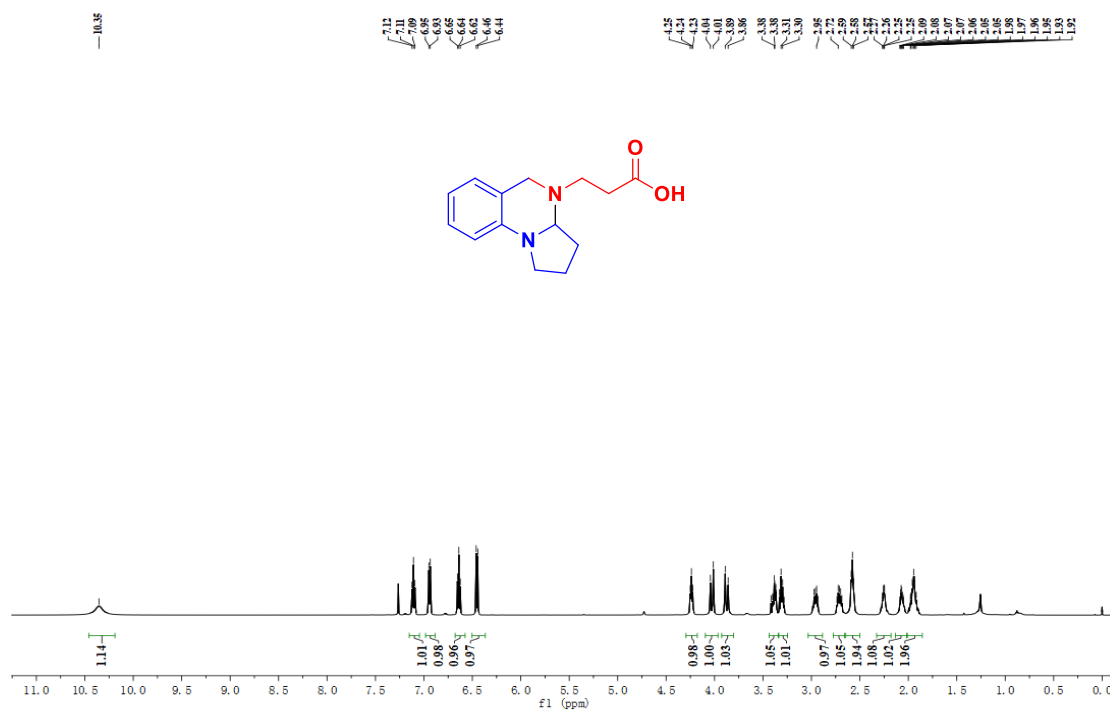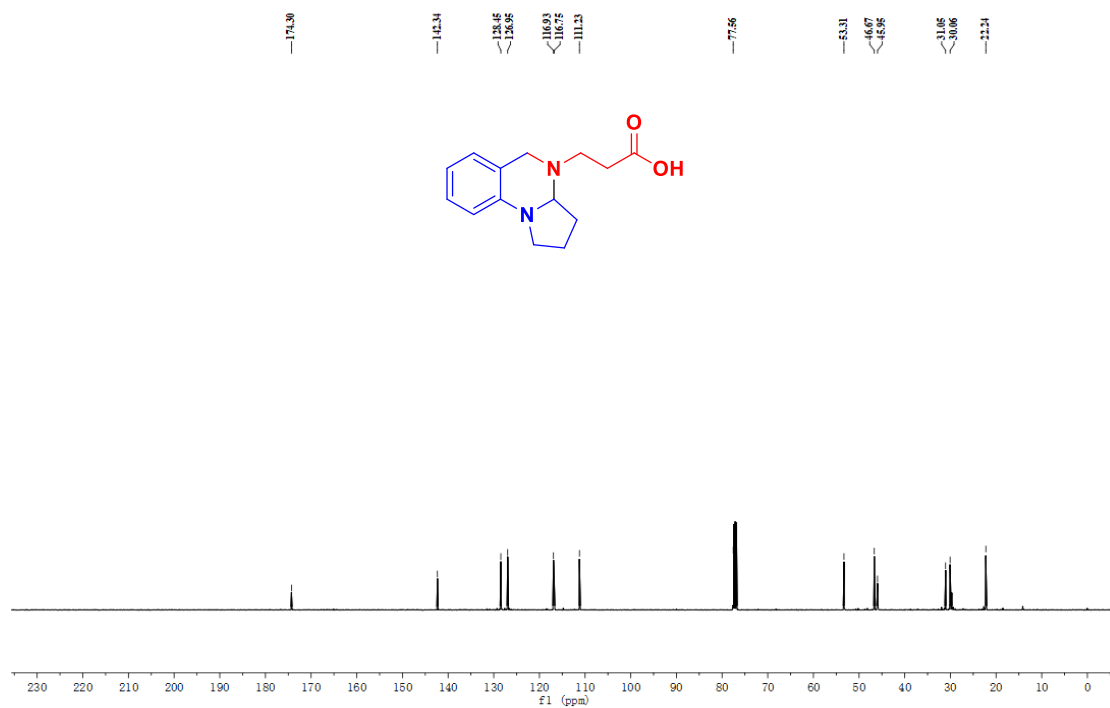

3-(9-chloro-1,2,3,3a-tetrahydropyrrolo[1,2-a]quinazolin-4(5H)-yl)propanoic acid (3b)

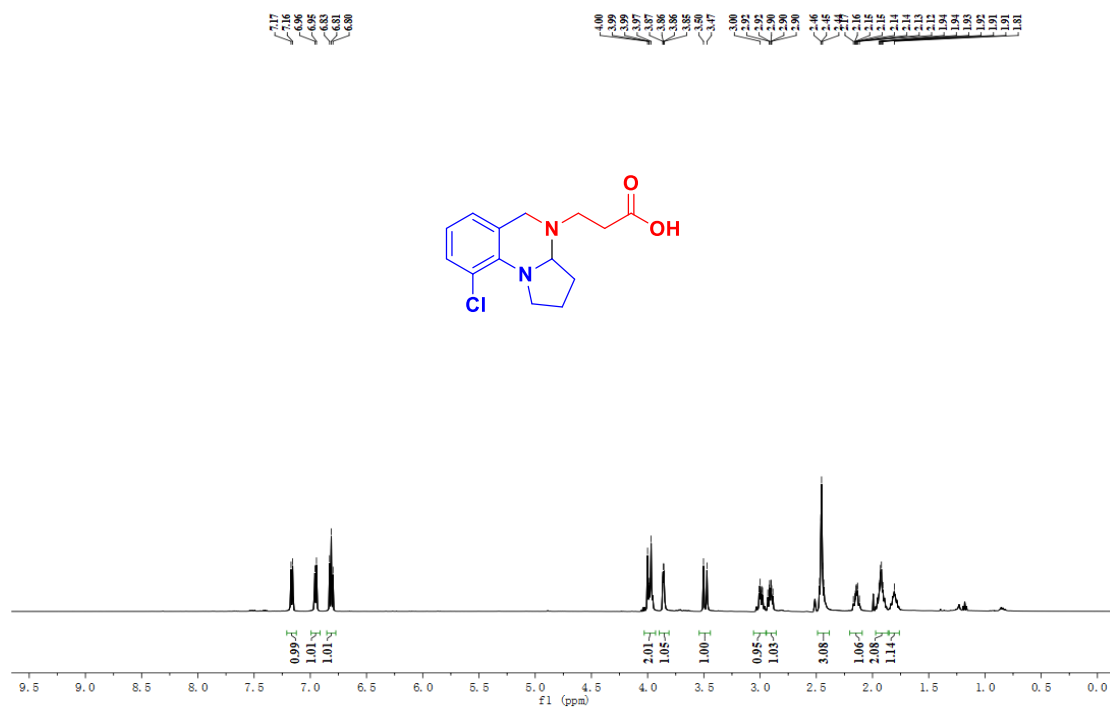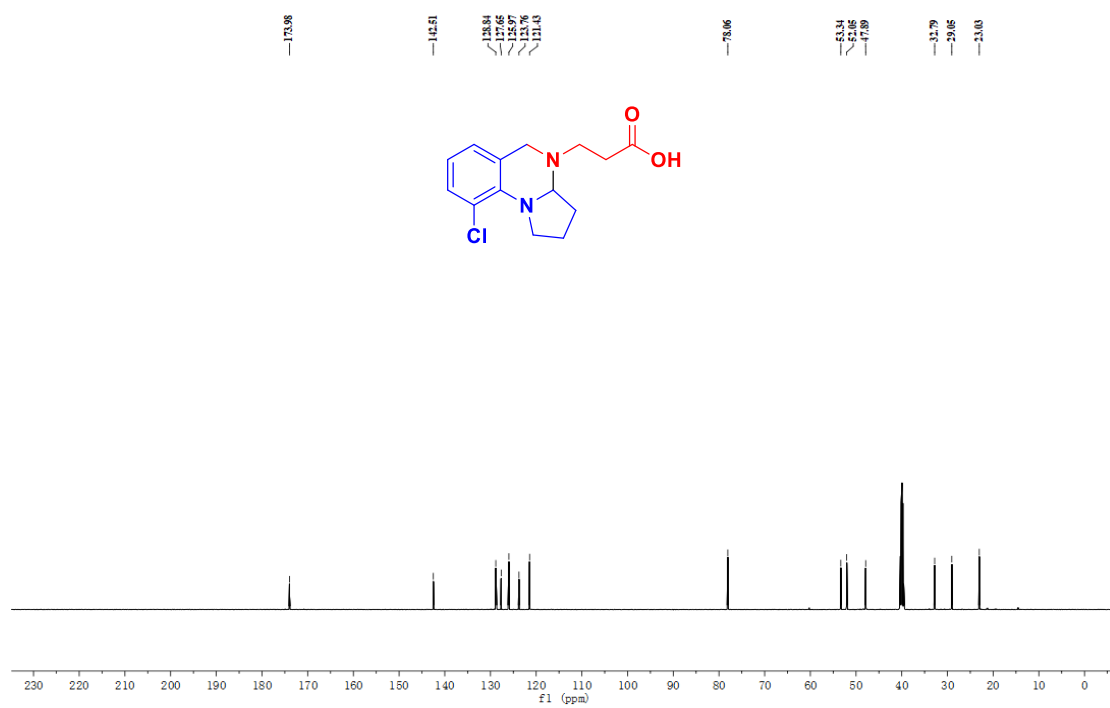

**3-(8-(trifluoromethyl)-1,2,3,3a-tetrahydropyrrolo[1,2-a]quinazolin-4(5H)-yl)propanoic acid (3c)**

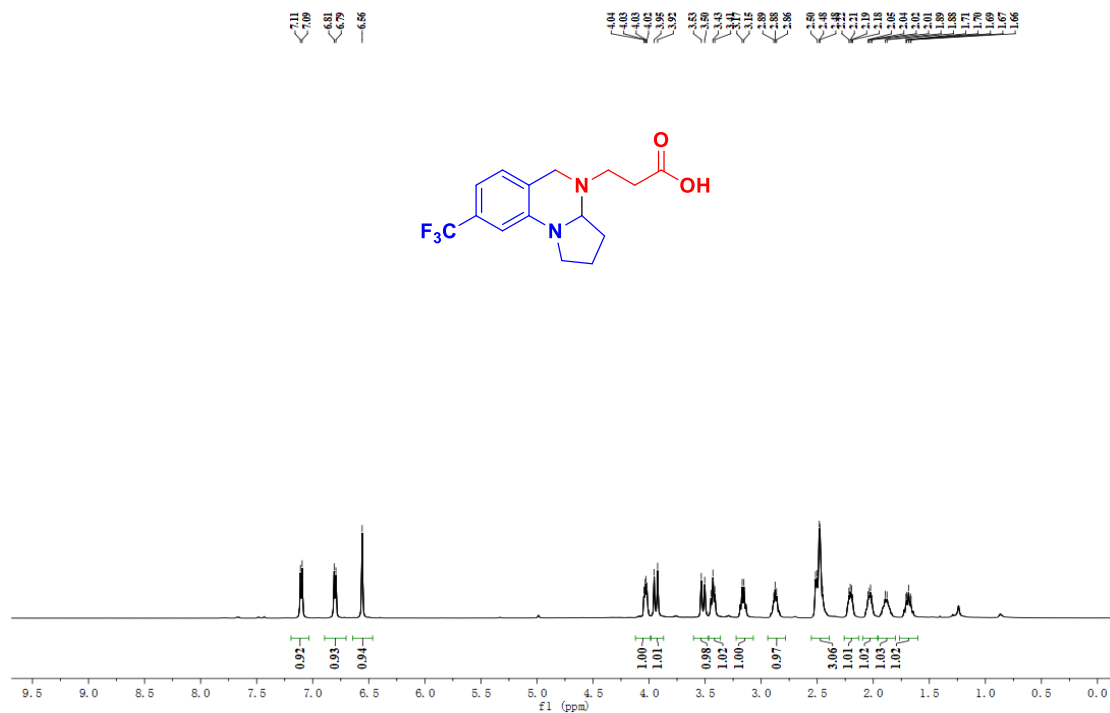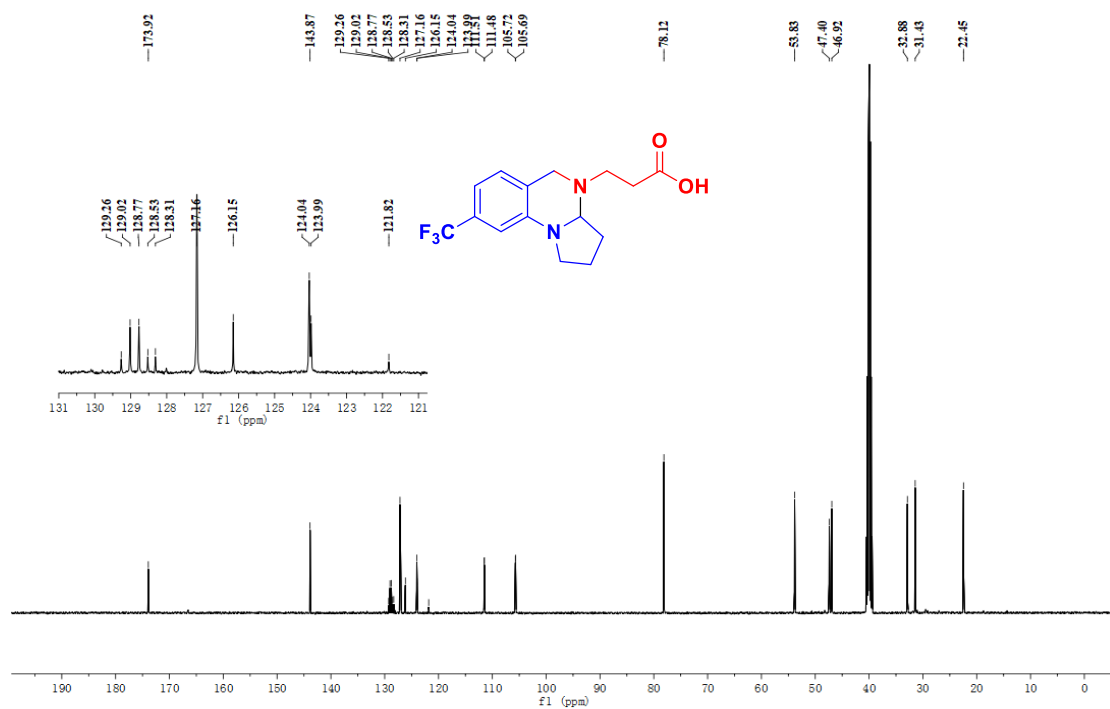

3-(8-bromo-1,2,3,3a-tetrahydropyrrolo[1,2-a]quinazolin-4(5H)-yl)propanoic acid (3d)

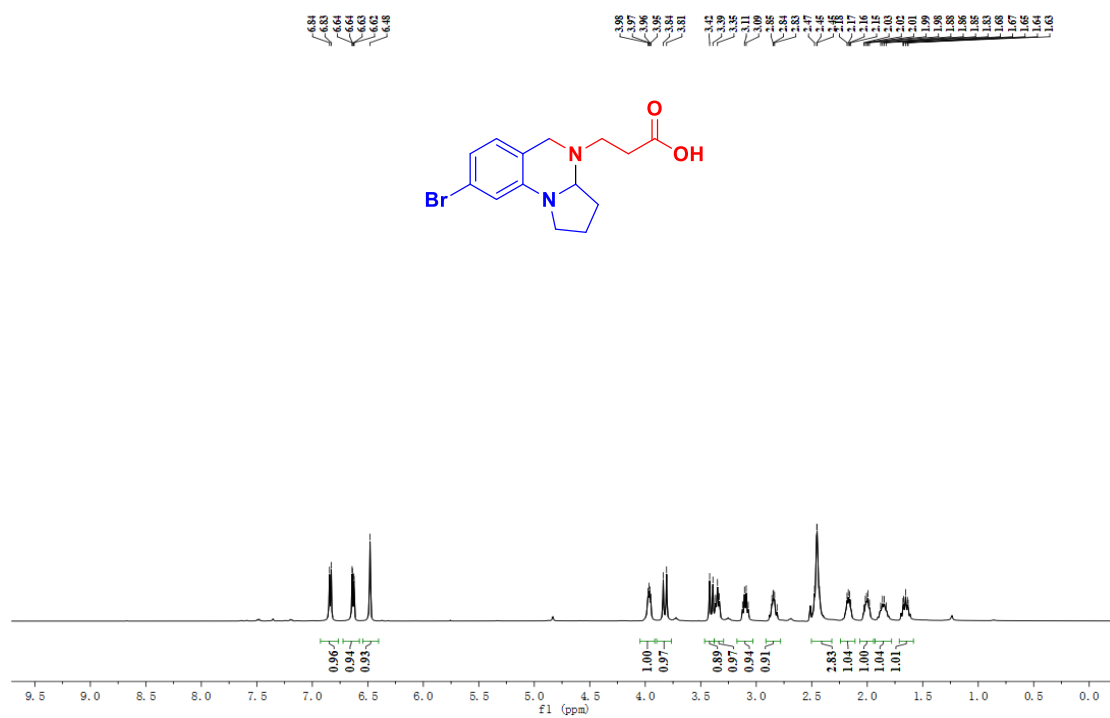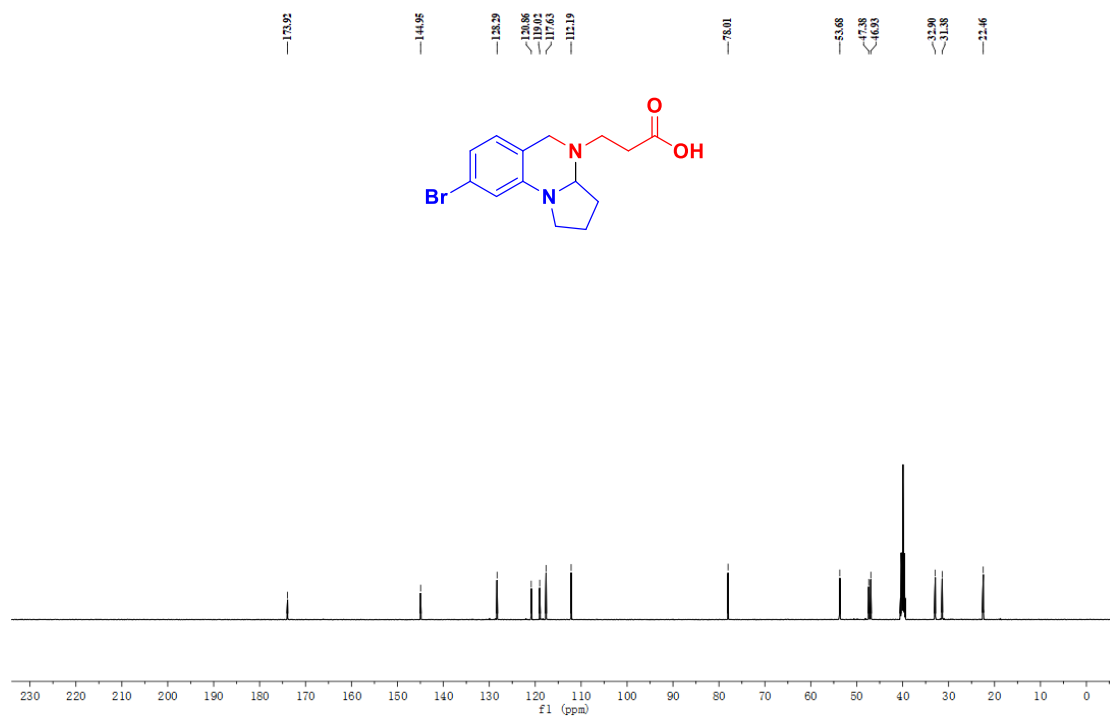

3-(6-fluoro-1,2,3,3a-tetrahydropyrrolo[1,2-a]quinazolin-4(5H)-yl)propanoic acid (3e)

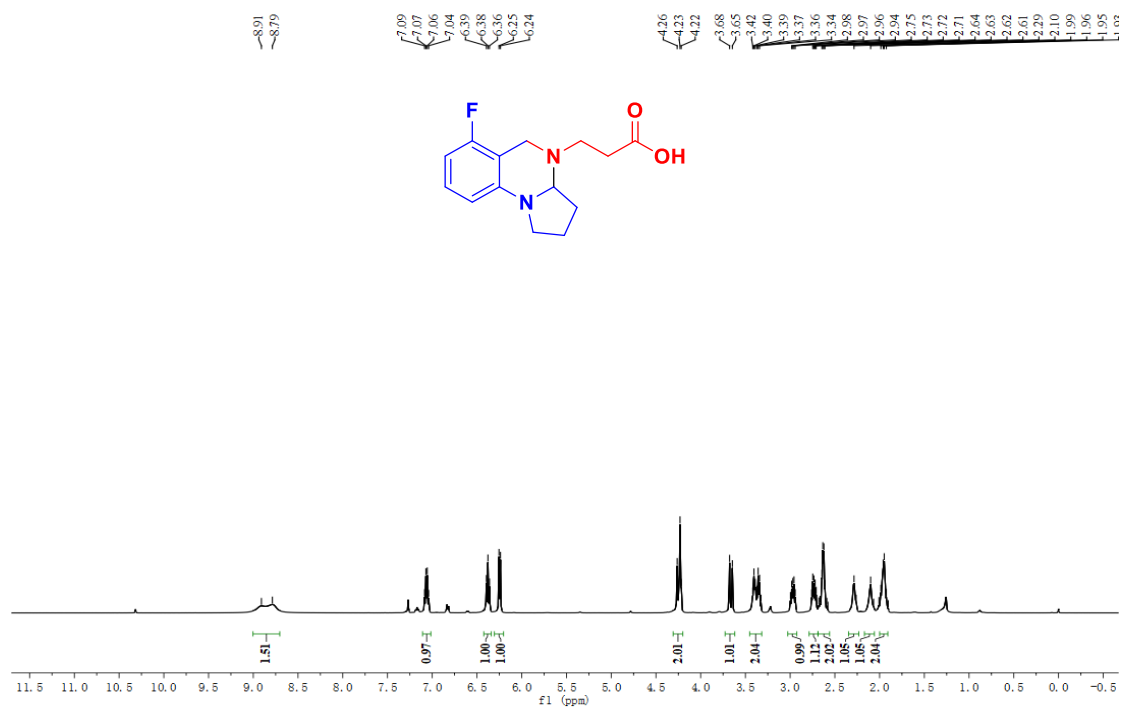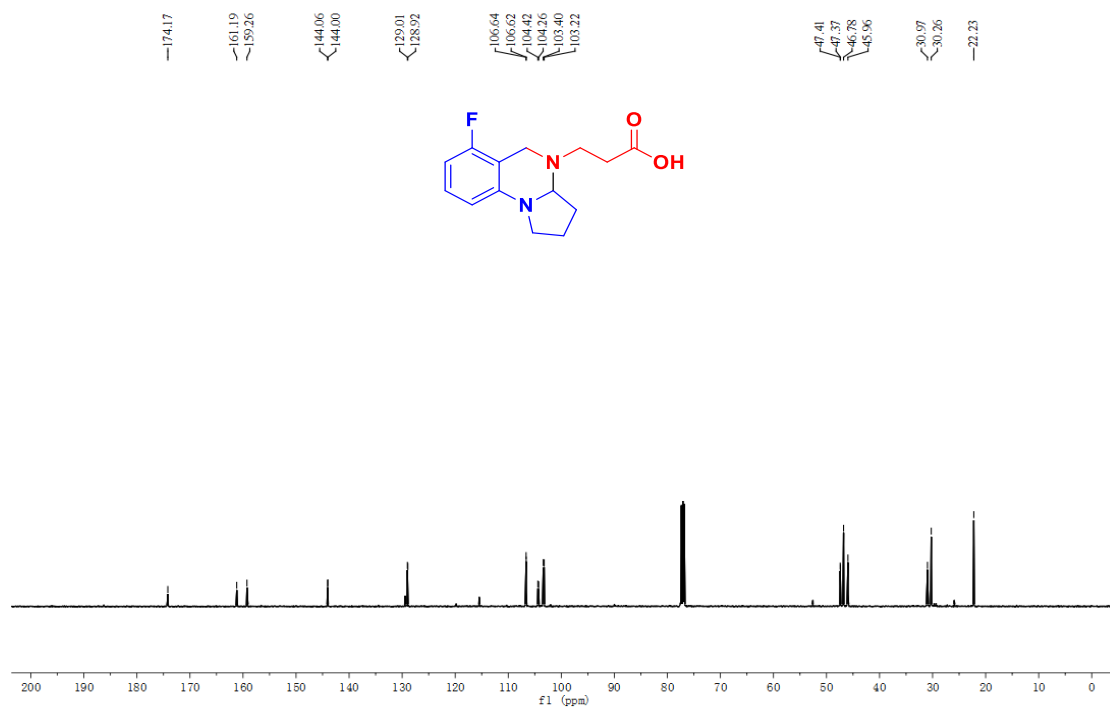



### 3-(6-bromo-1,2,3,3a-tetrahydropyrrolo[1,2-a]quinazolin-4(5H)-yl)propanoic acid (3f)

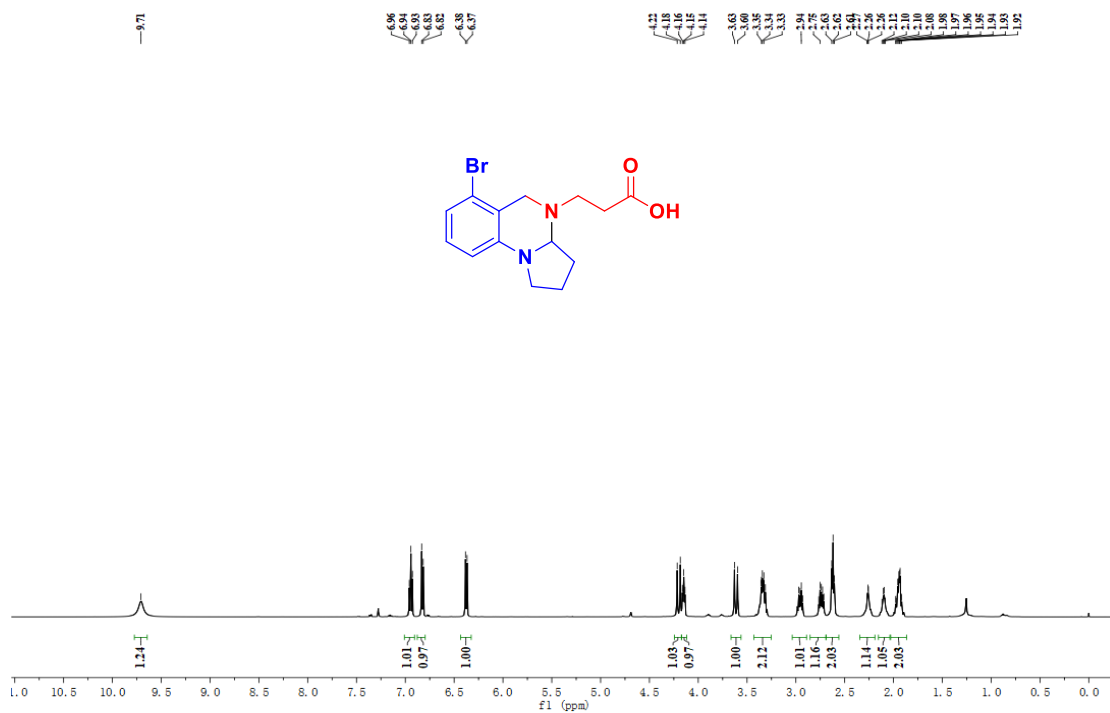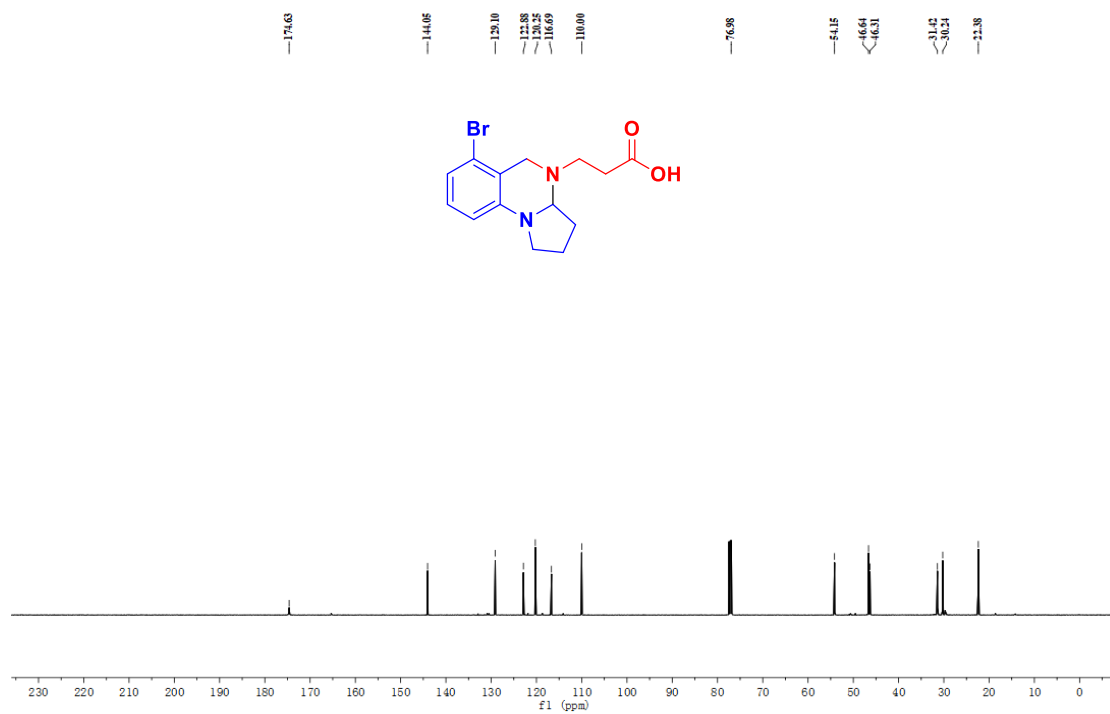

3-(6a,7,8,9,10,11-hexahydroazepino[1,2-a]quinazolin-6(5H)-yl)propanoic acid (3g)

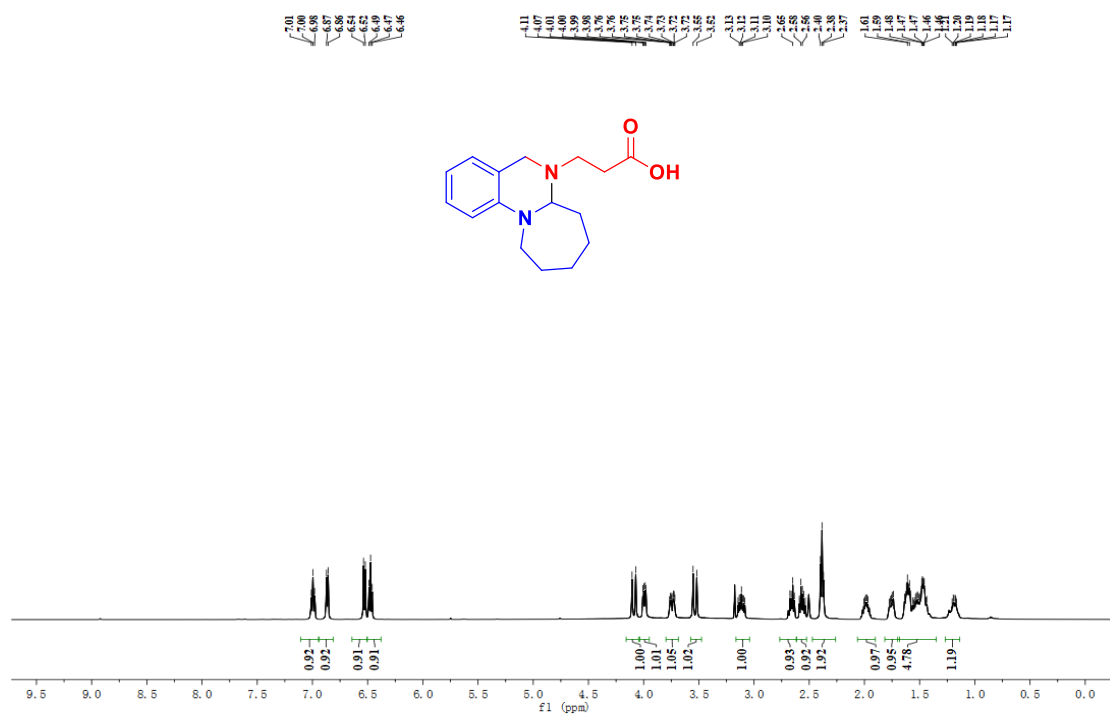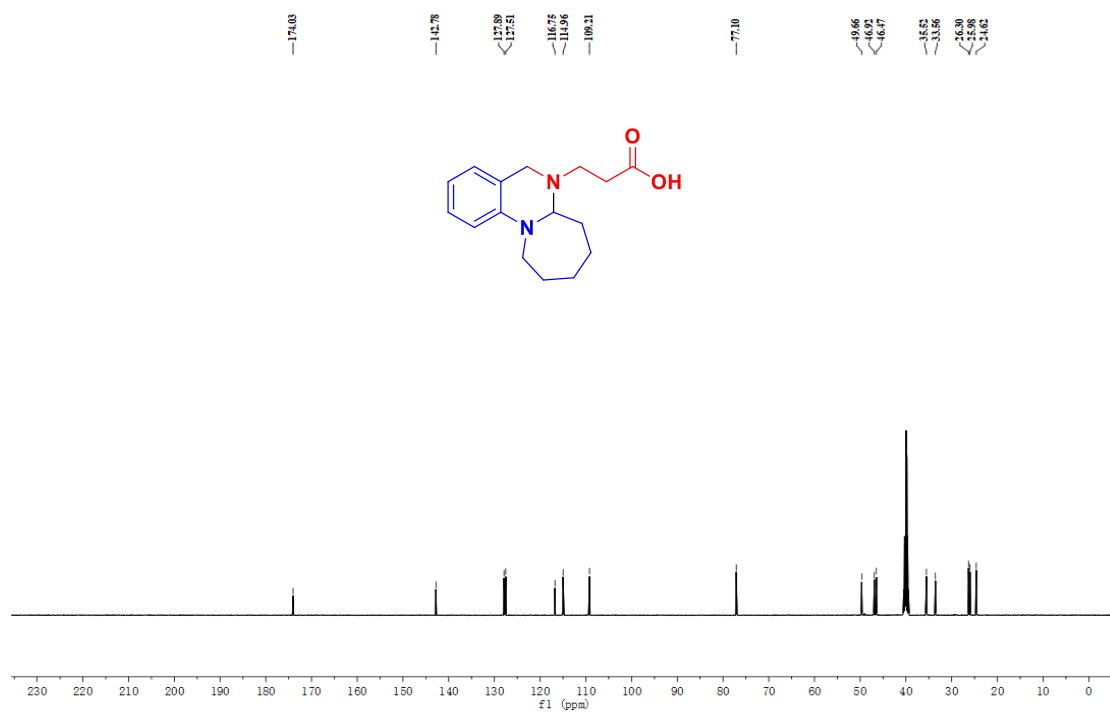

3-(12,13-dihydro-6H-isoquinolino[2,1-a]quinazolin-5(4bH)-yl)propanoic acid (3h)

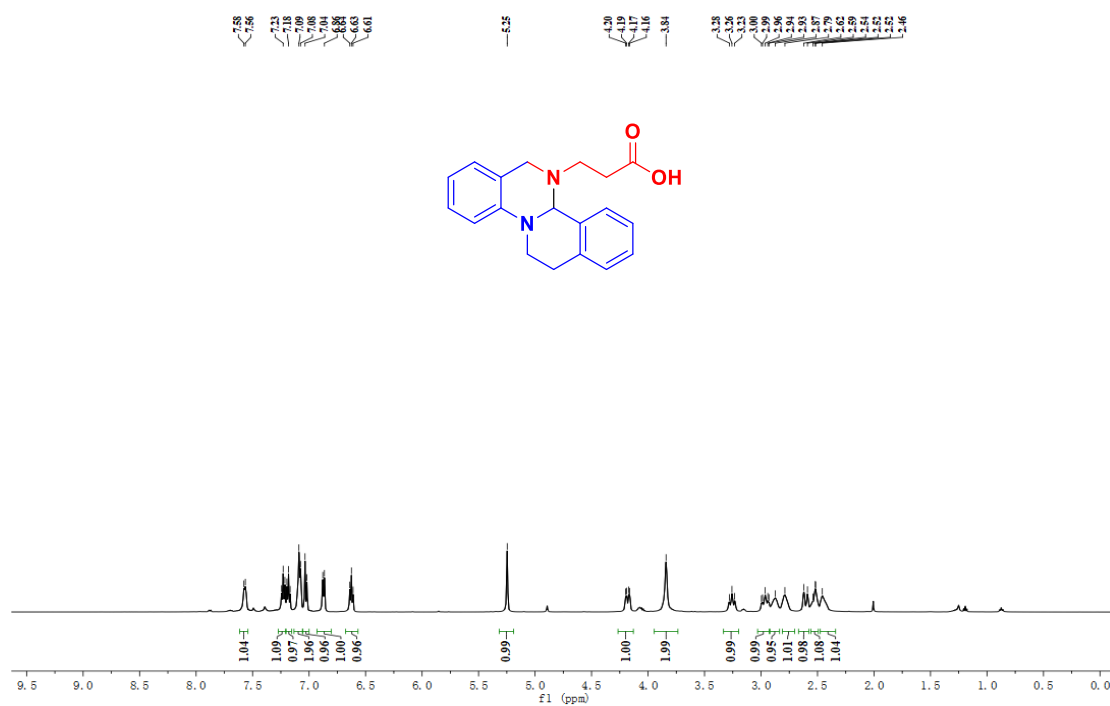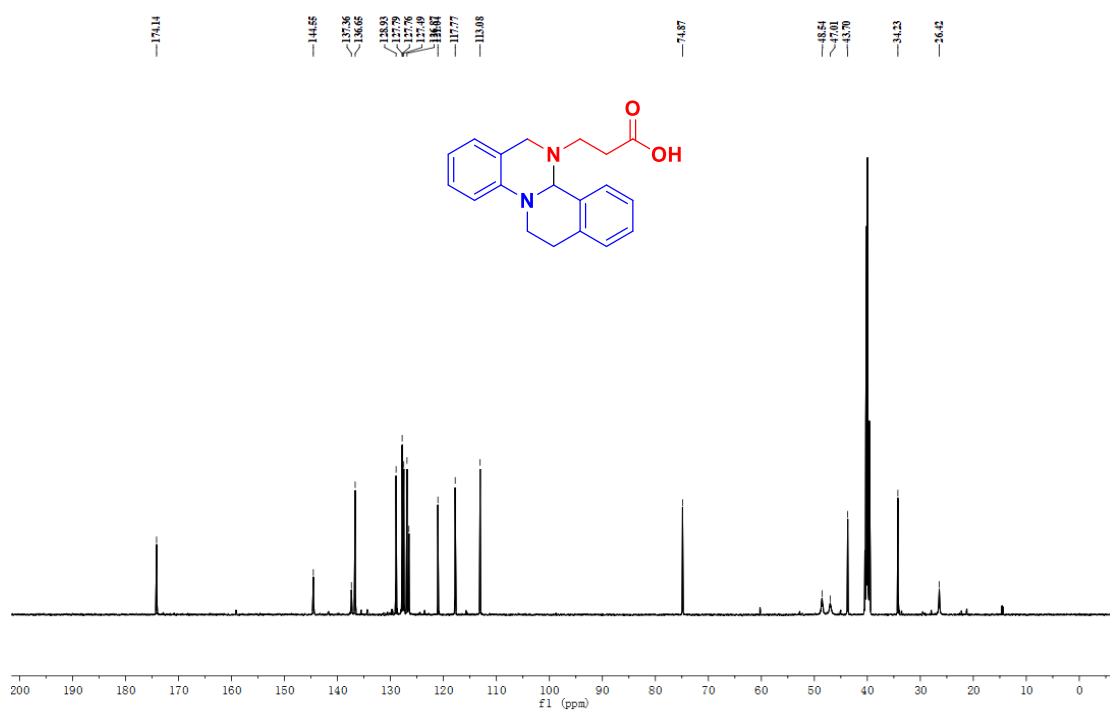

3-(6a,6b,7,8,9,10,10a,11-octahydroisindolo[2,1-a]quinazolin-6(5H)-yl)propanoic acid (3i)

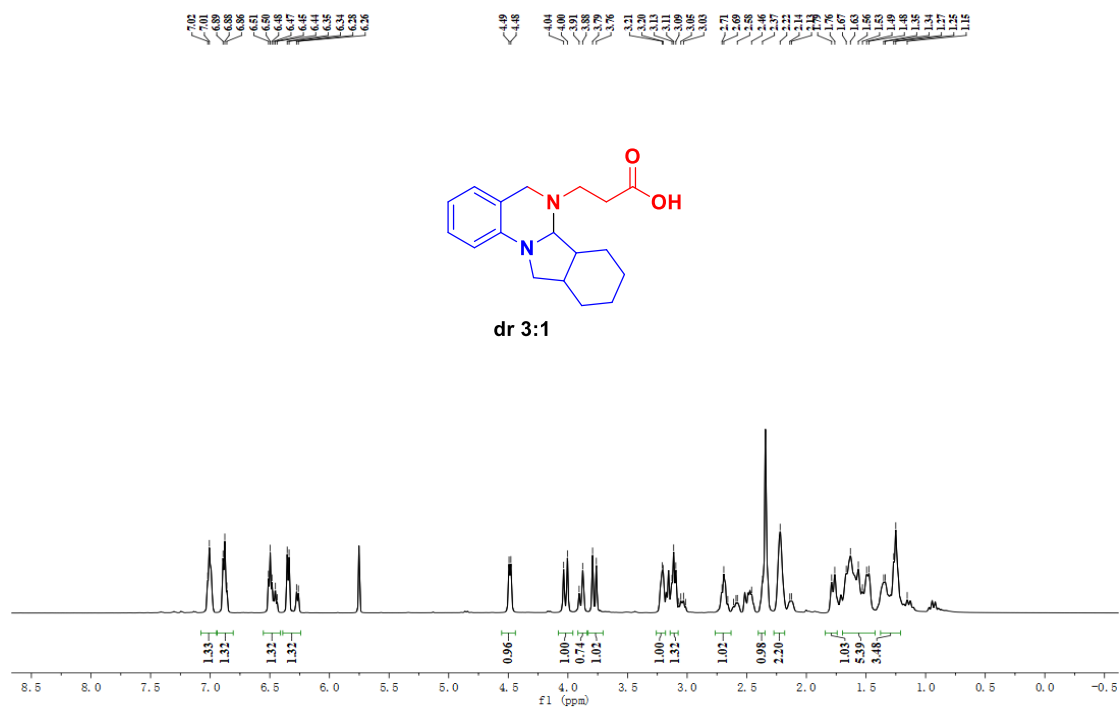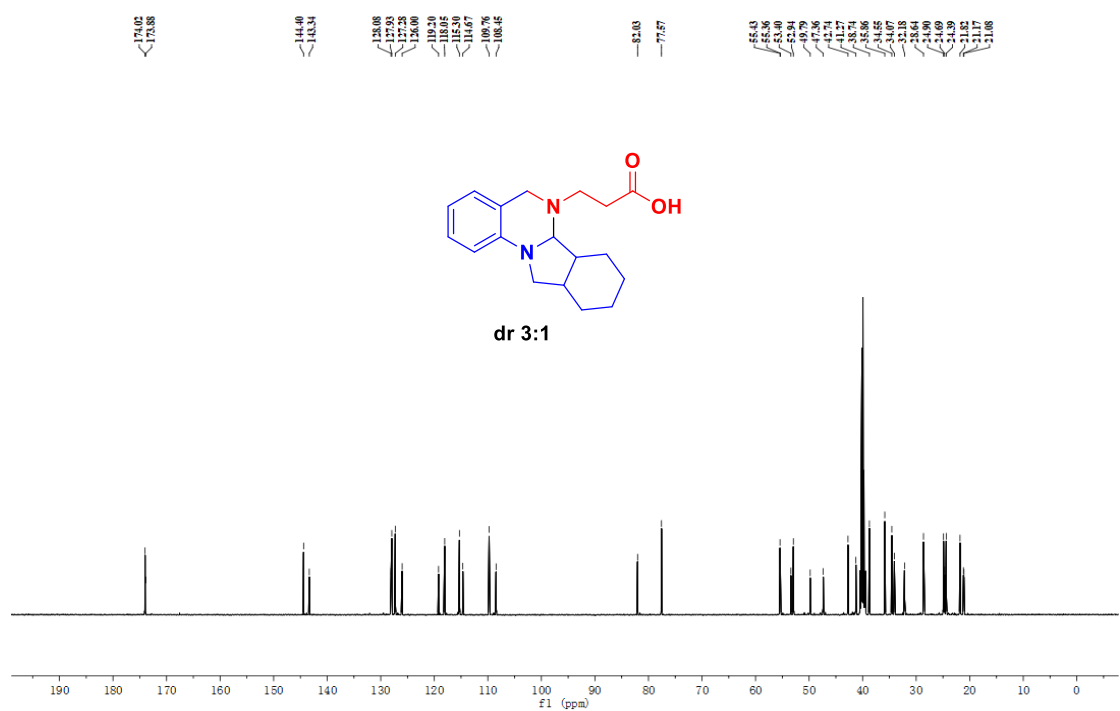

3-(1,2,3,3a-tetrahydronaphtho[1,8-ef]pyrrolo[1,2-a][1,3]diazepin-4(5H)-yl)propanoic acid (3j)

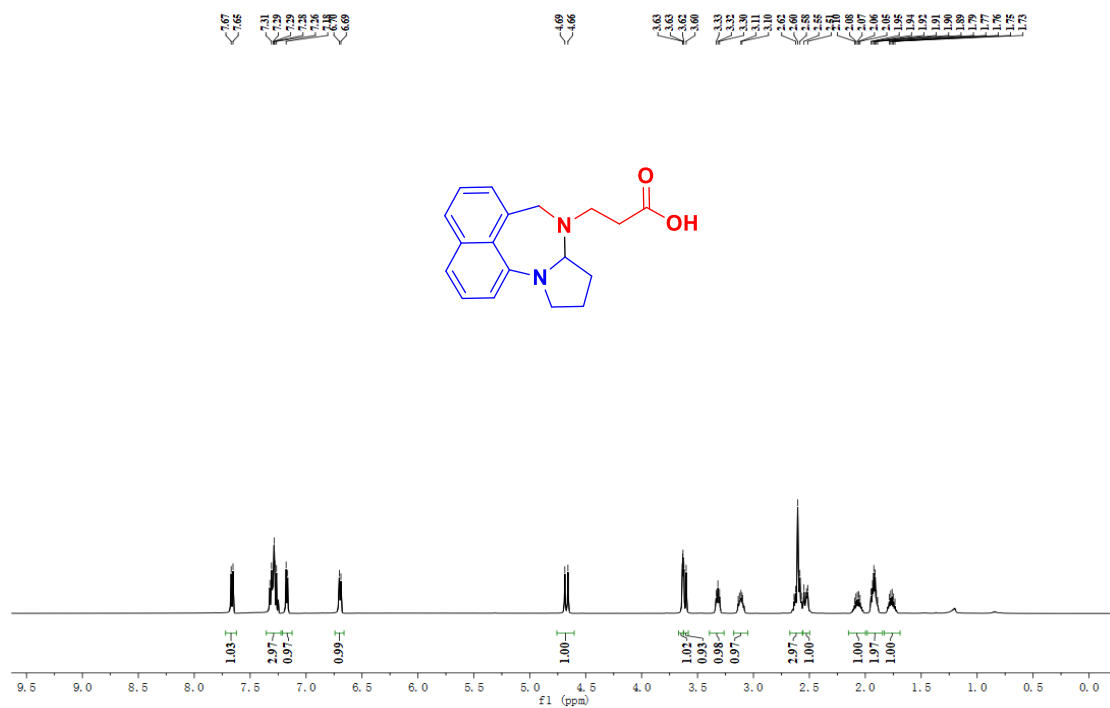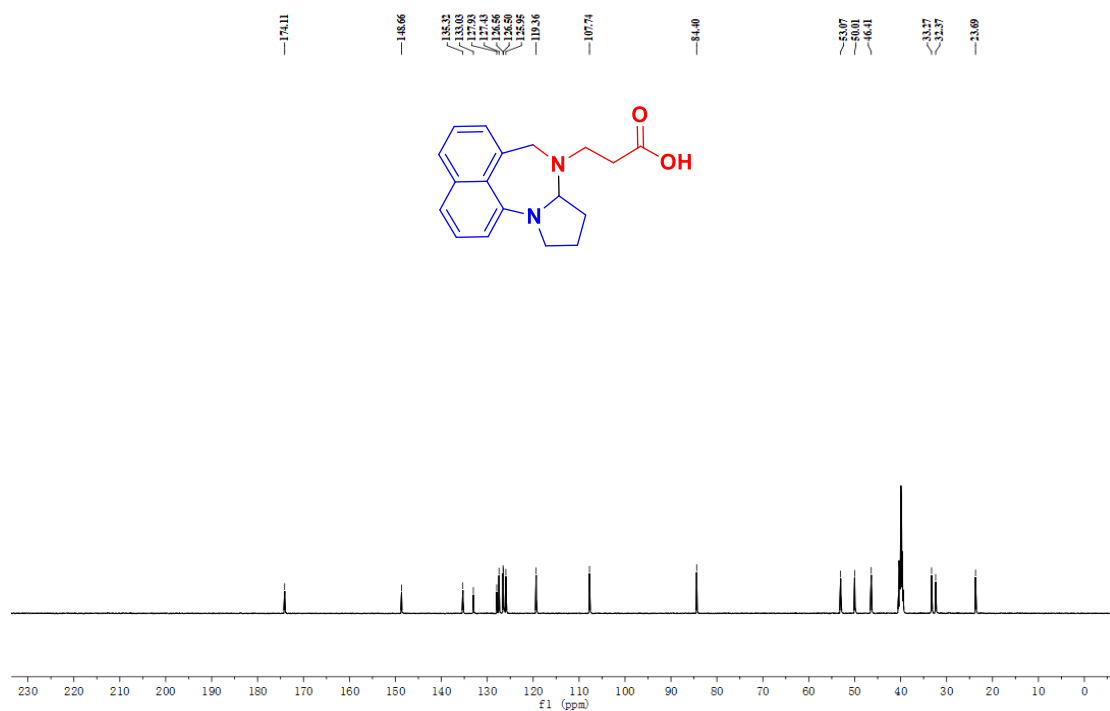

### 3-methyl-2-(1,2,3,3a-tetrahydropyrrolo[1,2-a]quinazolin-4(5H)-yl)butanoic acid (5a)

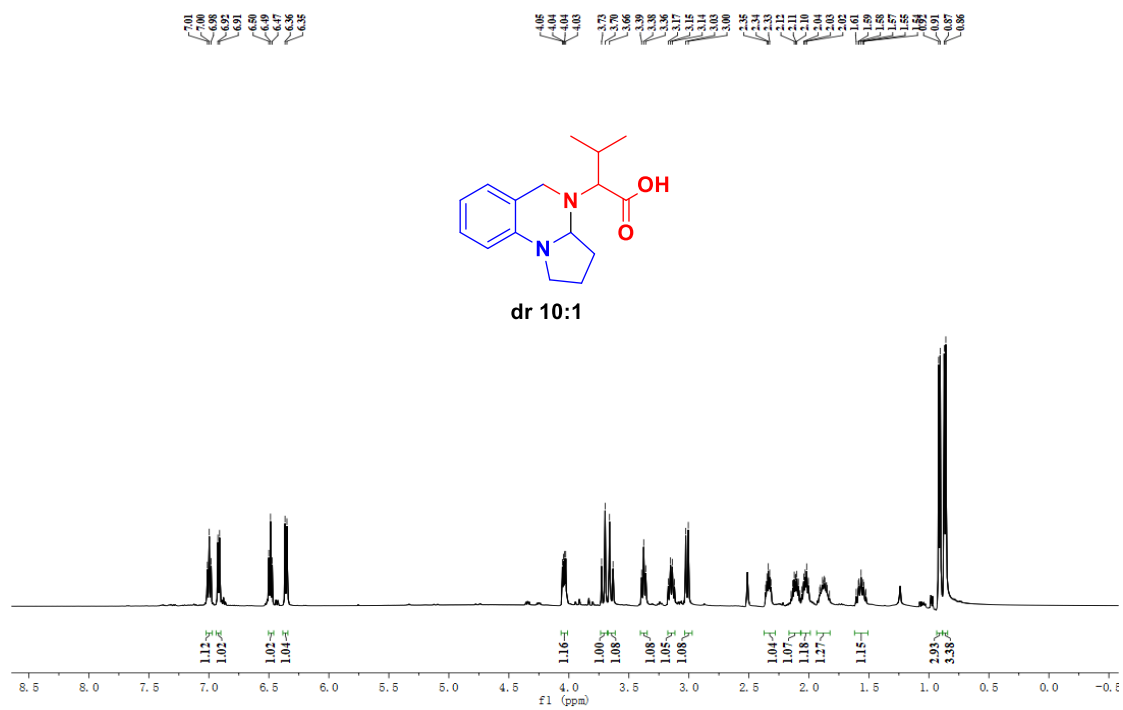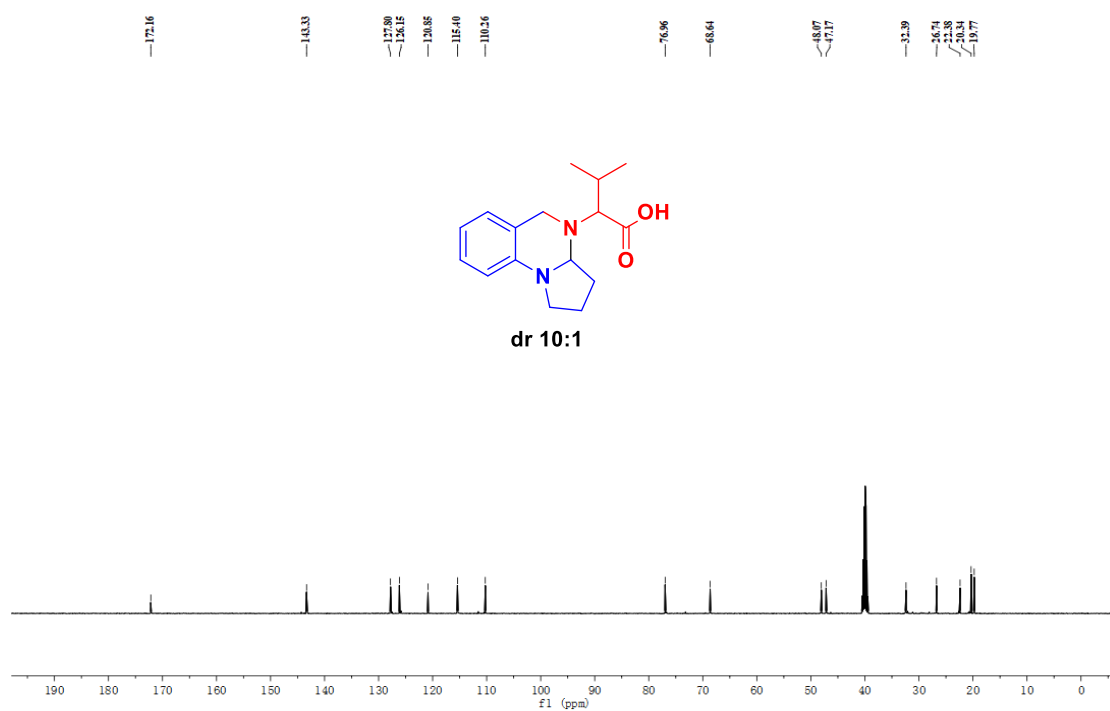

### 3-methyl-2-(1,2,3,3a-tetrahydropyrrolo[1,2-a]quinazolin-4(5H)-yl)pentanoic acid (5b)

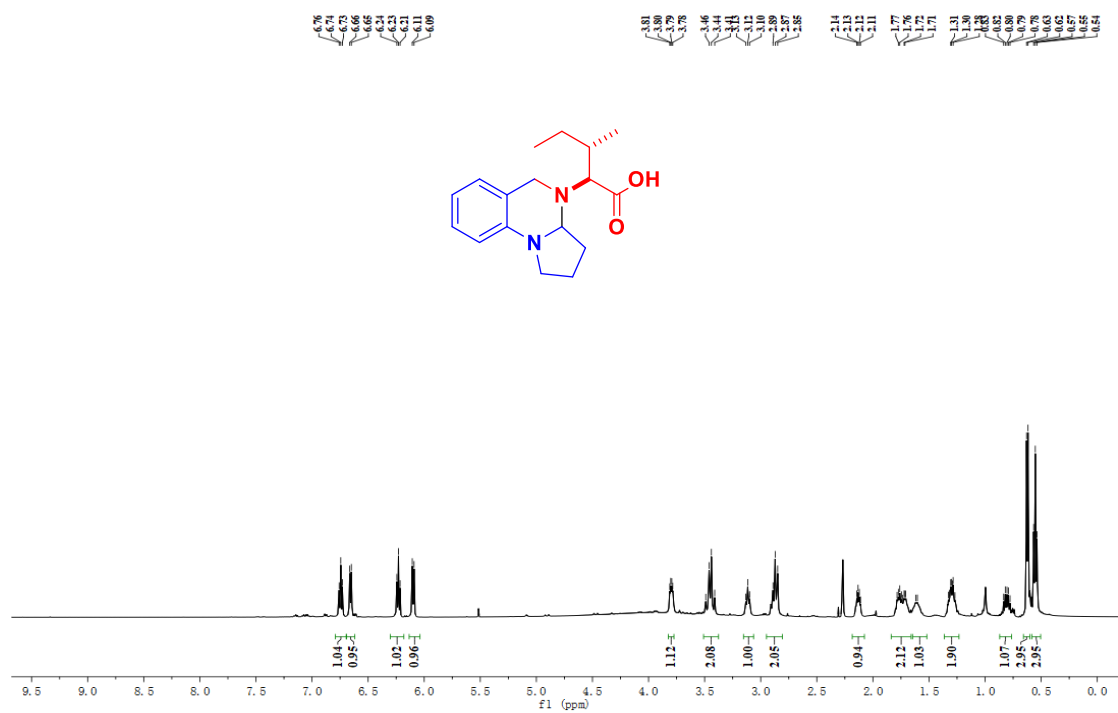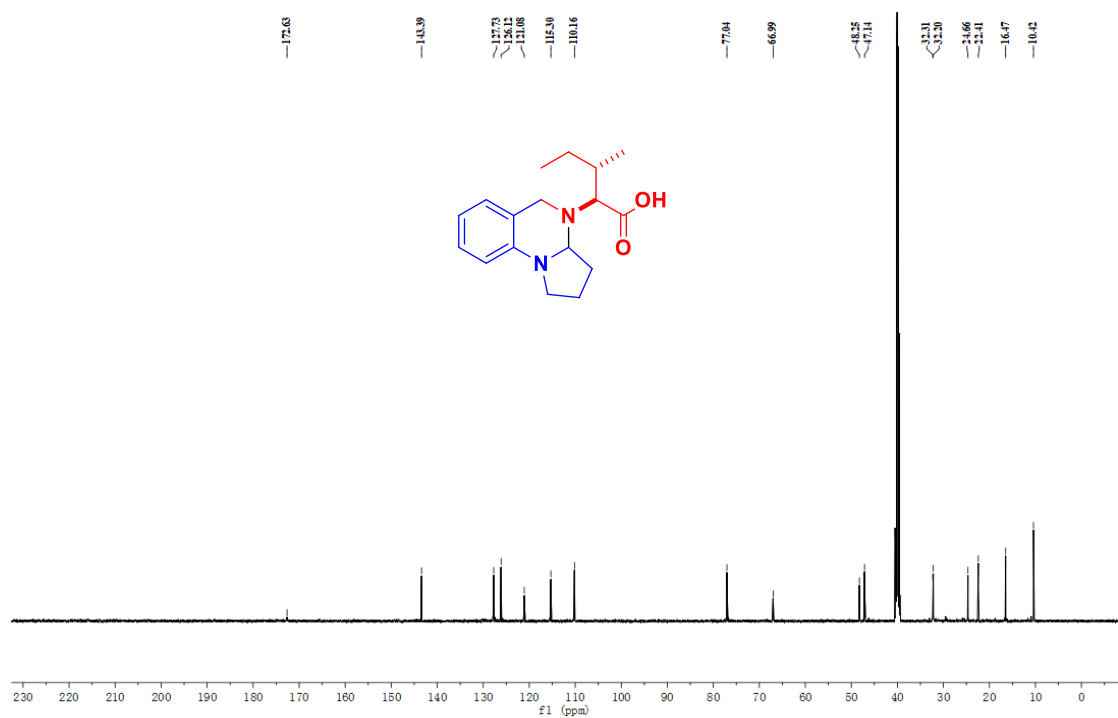

3-hydroxy-2-(1,2,3,3a-tetrahydropyrrolo[1,2-a]quinazolin-4(5H)-yl)propanoic acid (5c)

7.02  
7.01  
6.99  
6.90  
6.81  
6.80  
6.79  
6.67

4.45  
4.24  
3.95  
3.81  
3.79  
3.77  
3.74  
3.39  
3.16  
3.14

2.29  
2.03  
1.90  
1.88  
1.66

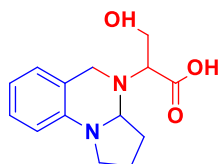

dr 4:1

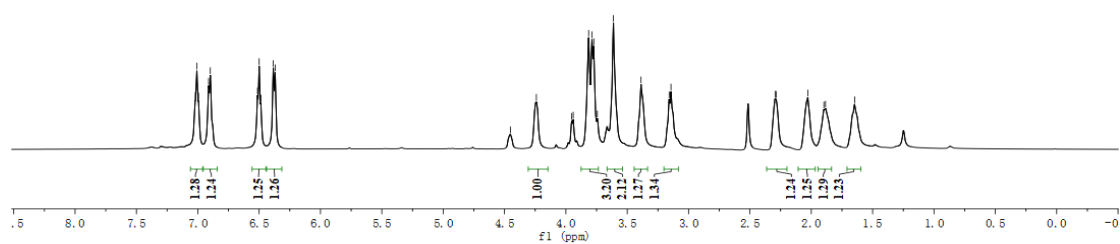

172.01

143.33

127.81

126.31

120.62

115.48

110.49

76.53

63.73

60.65

48.93

47.18

32.01

22.42

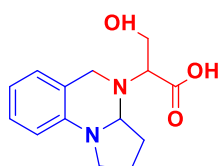

dr 4:1

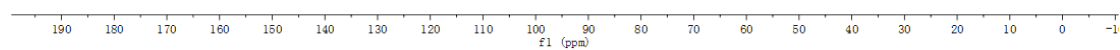



2-(1,2,3,3a-tetrahydropyrrolo[1,2-a]quinazolin-4(5H)-yl)propanoic acid (5d)

7.08  
7.01  
6.99  
6.98  
6.92  
6.90  
6.89  
6.88  
6.50  
6.30  
6.49  
6.47  
6.38  
6.36  
6.28  
6.27  
6.25  
6.25  
6.17  
6.16  
6.15  
6.14  
5.83  
5.81  
5.79  
5.77  
5.76  
5.75  
5.73  
5.72  
5.71  
5.69  
5.67  
5.40  
5.38  
5.36  
5.34  
5.33  
5.33  
5.18  
5.15  
5.12  
5.10  
5.10  
2.26  
2.25  
2.24  
2.24  
2.23  
2.22  
2.21  
2.19  
2.18  
2.17  
2.04  
2.02  
2.01  
1.99  
1.87  
1.86  
1.67  
1.65  
1.63  
1.61  
1.59  
1.29  
1.27  
1.18  
1.17

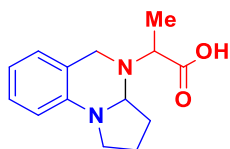

dr 3:1

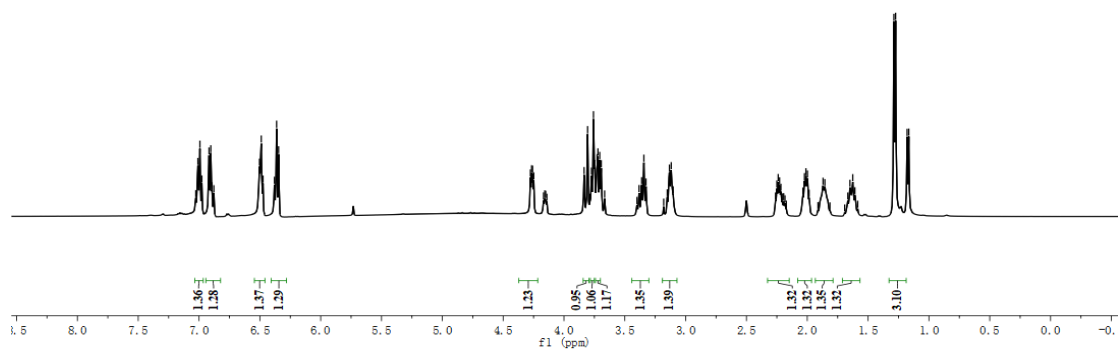

174.09  
173.67

143.46  
143.25

127.95  
127.79  
126.33  
126.30  
120.64  
120.27  
115.90  
115.46  
110.48  
110.45

76.45  
76.00

57.34  
56.29  
48.86  
47.74  
47.21  
47.02

31.94  
31.71

22.56  
22.47

16.17  
-9.57

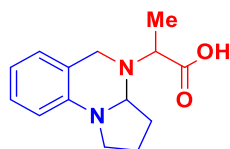

dr 3:1

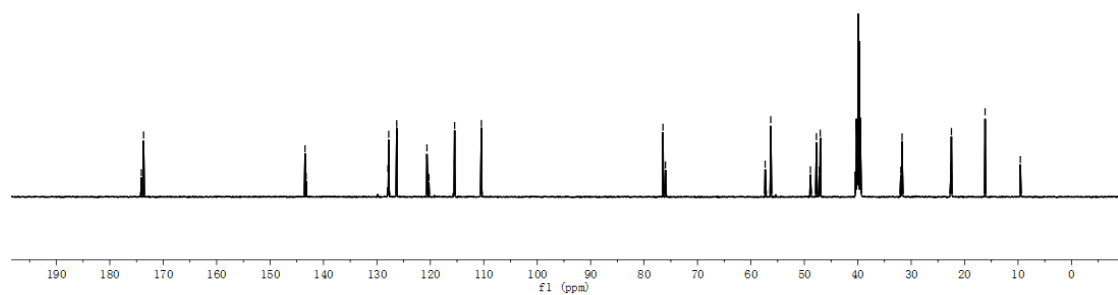

# 4-phenyl-2-(1,2,3,3a-tetrahydropyrrolo[1,2-a]quinazolin-4(5H)-yl)butanoic acid (5e)

7.31 7.30 7.29 7.28 7.27 7.26 7.25 7.24 7.23 7.22 7.21 7.20 7.19 7.18 7.17 7.16 7.15 7.14 7.13 7.12 7.11 7.10 6.99 6.98 6.97 6.96 6.95 6.94 6.93 6.92 6.91 6.90 6.89 6.88 6.87 6.86 6.85 6.84 6.83 6.82 6.81 6.80 6.79 6.78 6.77 6.76 6.75 6.74 6.73 6.72 6.71 6.70 6.69 6.68 6.67 6.66 6.65 6.64 6.63 6.62 6.61 6.60 6.59 6.58 6.57 6.56 6.55 6.54 6.53 6.52 6.51 6.50 6.49 6.48 6.47 6.46 6.45 6.44 6.43 6.42 6.41 6.40 6.39 6.38 6.37 6.36 6.35 6.34 6.33 6.32 6.31 6.30 6.29 6.28 6.27 6.26 6.25 6.24 6.23 6.22 6.21 6.20 6.19 6.18 6.17 6.16 6.15 6.14 6.13 6.12 6.11 6.10 6.09 6.08 6.07 6.06 6.05 6.04 6.03 6.02 6.01 6.00 5.99 5.98 5.97 5.96 5.95 5.94 5.93 5.92 5.91 5.90 5.89 5.88 5.87 5.86 5.85 5.84 5.83 5.82 5.81 5.80 5.79 5.78 5.77 5.76 5.75 5.74 5.73 5.72 5.71 5.70 5.69 5.68 5.67 5.66 5.65 5.64 5.63 5.62 5.61 5.60 5.59 5.58 5.57 5.56 5.55 5.54 5.53 5.52 5.51 5.50 5.49 5.48 5.47 5.46 5.45 5.44 5.43 5.42 5.41 5.40 5.39 5.38 5.37 5.36 5.35 5.34 5.33 5.32 5.31 5.30 5.29 5.28 5.27 5.26 5.25 5.24 5.23 5.22 5.21 5.20 5.19 5.18 5.17 5.16 5.15 5.14 5.13 5.12 5.11 5.10 5.09 5.08 5.07 5.06 5.05 5.04 5.03 5.02 5.01 5.00 4.99 4.98 4.97 4.96 4.95 4.94 4.93 4.92 4.91 4.90 4.89 4.88 4.87 4.86 4.85 4.84 4.83 4.82 4.81 4.80 4.79 4.78 4.77 4.76 4.75 4.74 4.73 4.72 4.71 4.70 4.69 4.68 4.67 4.66 4.65 4.64 4.63 4.62 4.61 4.60 4.59 4.58 4.57 4.56 4.55 4.54 4.53 4.52 4.51 4.50 4.49 4.48 4.47 4.46 4.45 4.44 4.43 4.42 4.41 4.40 4.39 4.38 4.37 4.36 4.35 4.34 4.33 4.32 4.31 4.30 4.29 4.28 4.27 4.26 4.25 4.24 4.23 4.22 4.21 4.20 4.19 4.18 4.17 4.16 4.15 4.14 4.13 4.12 4.11 4.10 4.09 4.08 4.07 4.06 4.05 4.04 4.03 4.02 4.01 4.00 3.99 3.98 3.97 3.96 3.95 3.94 3.93 3.92 3.91 3.90 3.89 3.88 3.87 3.86 3.85 3.84 3.83 3.82 3.81 3.80 3.79 3.78 3.77 3.76 3.75 3.74 3.73 3.72 3.71 3.70 3.69 3.68 3.67 3.66 3.65 3.64 3.63 3.62 3.61 3.60 3.59 3.58 3.57 3.56 3.55 3.54 3.53 3.52 3.51 3.50 3.49 3.48 3.47 3.46 3.45 3.44 3.43 3.42 3.41 3.40 3.39 3.38 3.37 3.36 3.35 3.34 3.33 3.32 3.31 3.30 3.29 3.28 3.27 3.26 3.25 3.24 3.23 3.22 3.21 3.20 3.19 3.18 3.17 3.16 3.15 3.14 3.13 3.12 3.11 3.10 3.09 3.08 3.07 3.06 3.05 3.04 3.03 3.02 3.01 3.00 2.99 2.98 2.97 2.96 2.95 2.94 2.93 2.92 2.91 2.90 2.89 2.88 2.87 2.86 2.85 2.84 2.83 2.82 2.81 2.80 2.79 2.78 2.77 2.76 2.75 2.74 2.73 2.72 2.71 2.70 2.69 2.68 2.67 2.66 2.65 2.64 2.63 2.62 2.61 2.60 2.59 2.58 2.57 2.56 2.55 2.54 2.53 2.52 2.51 2.50 2.49 2.48 2.47 2.46 2.45 2.44 2.43 2.42 2.41 2.40 2.39 2.38 2.37 2.36 2.35 2.34 2.33 2.32 2.31 2.30 2.29 2.28 2.27 2.26 2.25 2.24 2.23 2.22 2.21 2.20 2.19 2.18 2.17 2.16 2.15 2.14 2.13 2.12 2.11 2.10 2.09 2.08 2.07 2.06 2.05 2.04 2.03 2.02 2.01 2.00 1.99 1.98 1.97 1.96 1.95 1.94 1.93 1.92 1.91 1.90 1.89 1.88 1.87 1.86 1.85 1.84 1.83 1.82 1.81 1.80 1.79 1.78 1.77 1.76 1.75 1.74 1.73 1.72 1.71 1.70 1.69 1.68 1.67 1.66 1.65 1.64 1.63 1.62 1.61 1.60 1.59 1.58 1.57 1.56 1.55 1.54 1.53 1.52 1.51 1.50 1.49 1.48

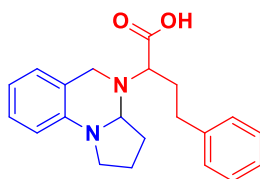

dr 5:1

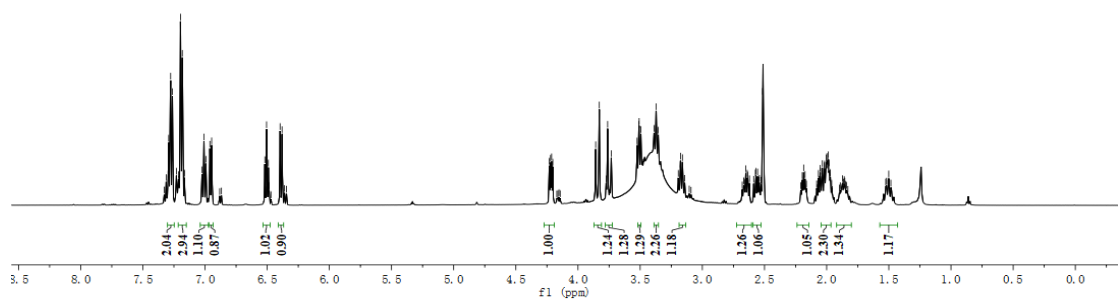

173.02 133.48 131.92 128.85 128.74 127.79 127.70 126.30 126.83 116.50 110.52 76.52 60.39 47.69 47.10 32.13 31.79 31.18 22.39

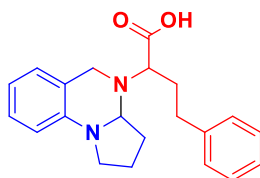

dr 5:1

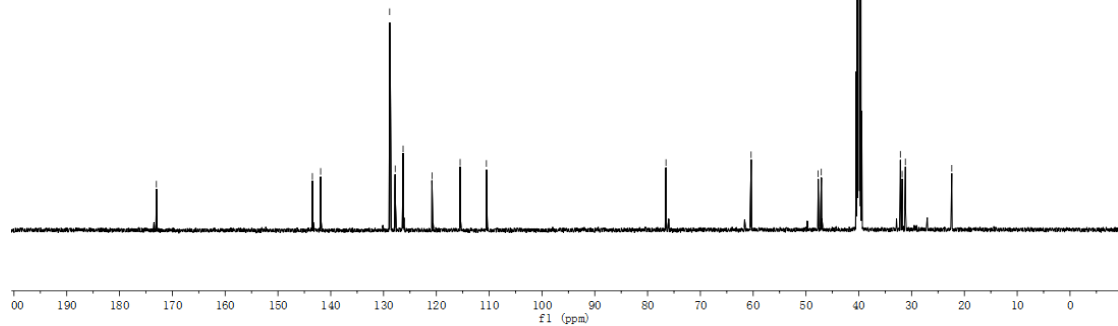

3-phenyl-2-(1,2,3,3a-tetrahydropyrrolo[1,2-a]quinazolin-4(5H)-yl)propanoic acid (5f)

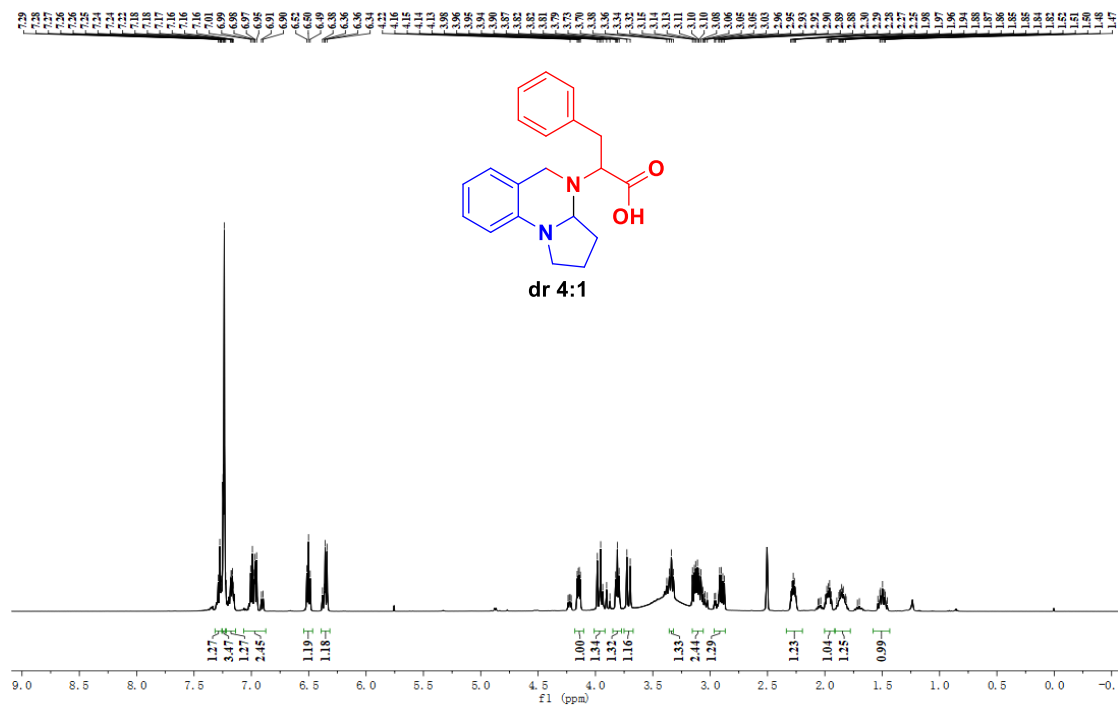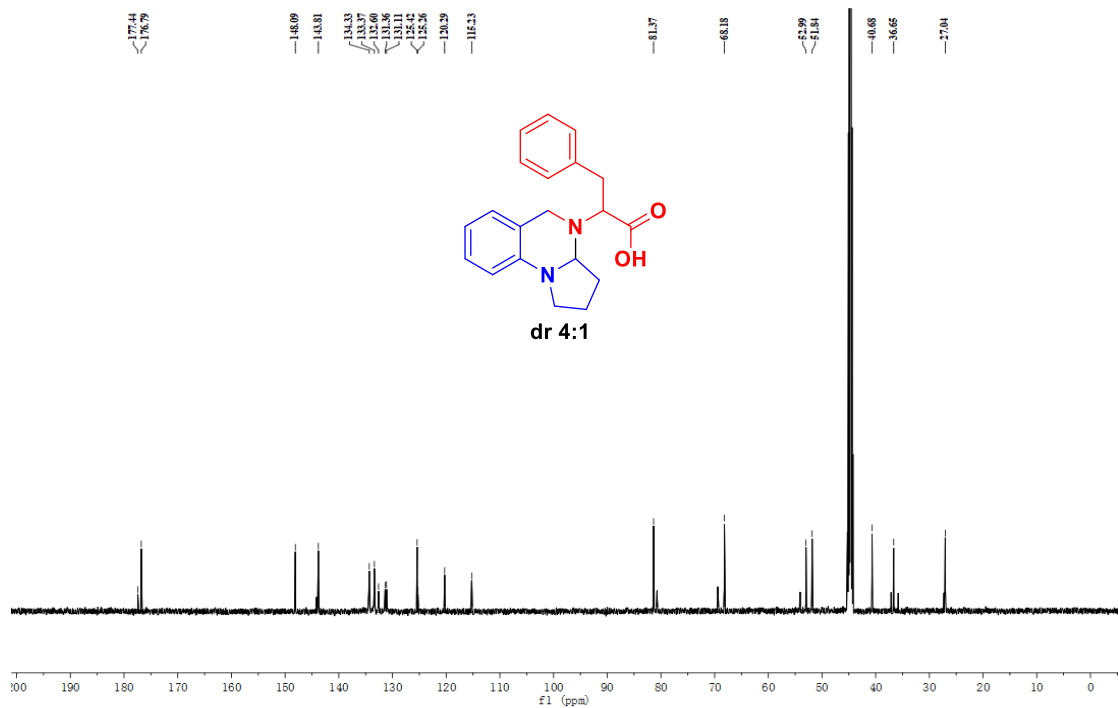

2-phenyl-2-(1,2,3,3a-tetrahydropyrrolo[1,2-a]quinazolin-4(5H)-yl)acetic acid (5g)

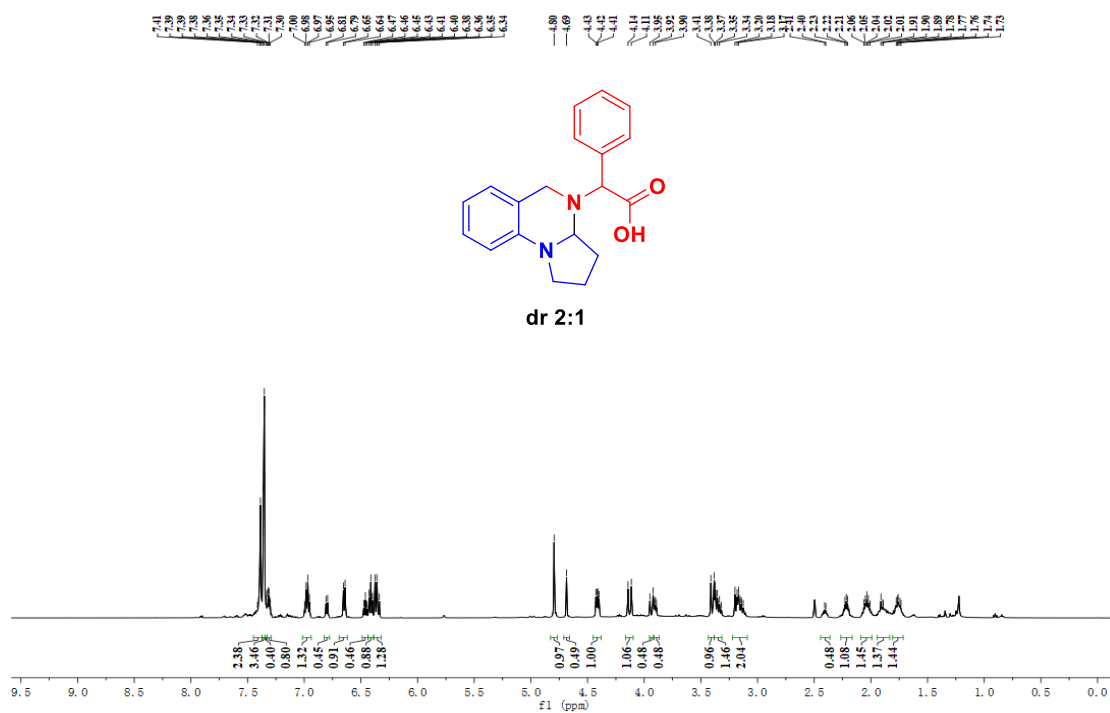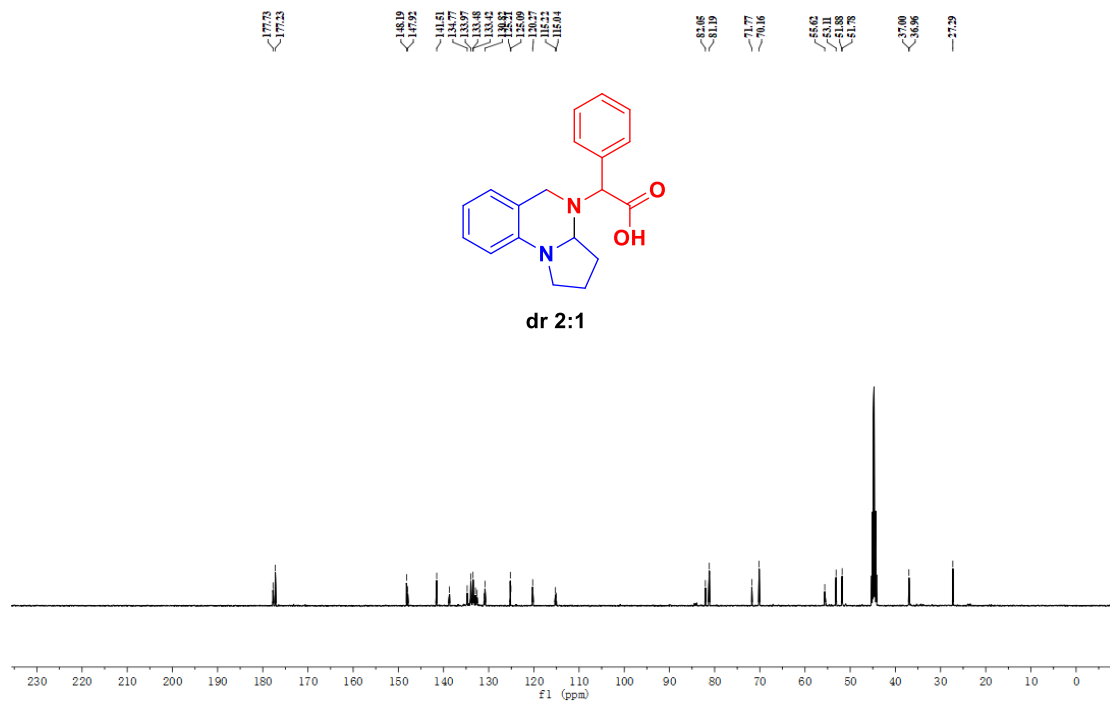

2-(1,2,3,3a-tetrahydropyrrolo[1,2-a]quinazolin-4(5H)-yl)acetic acid (5h)

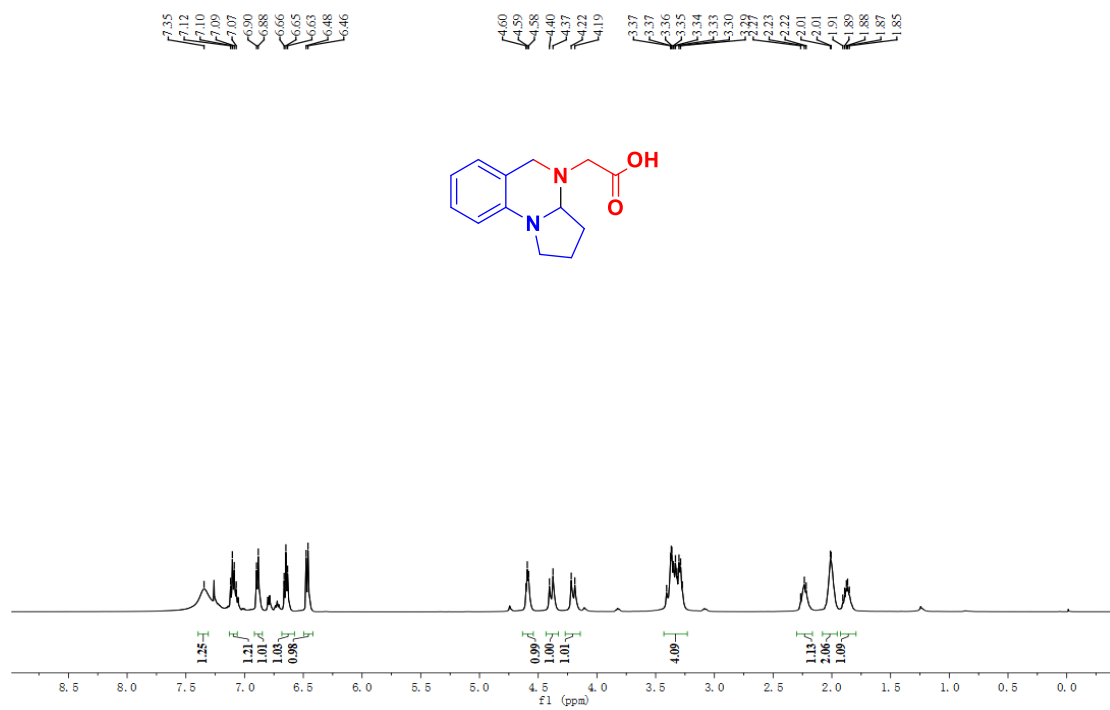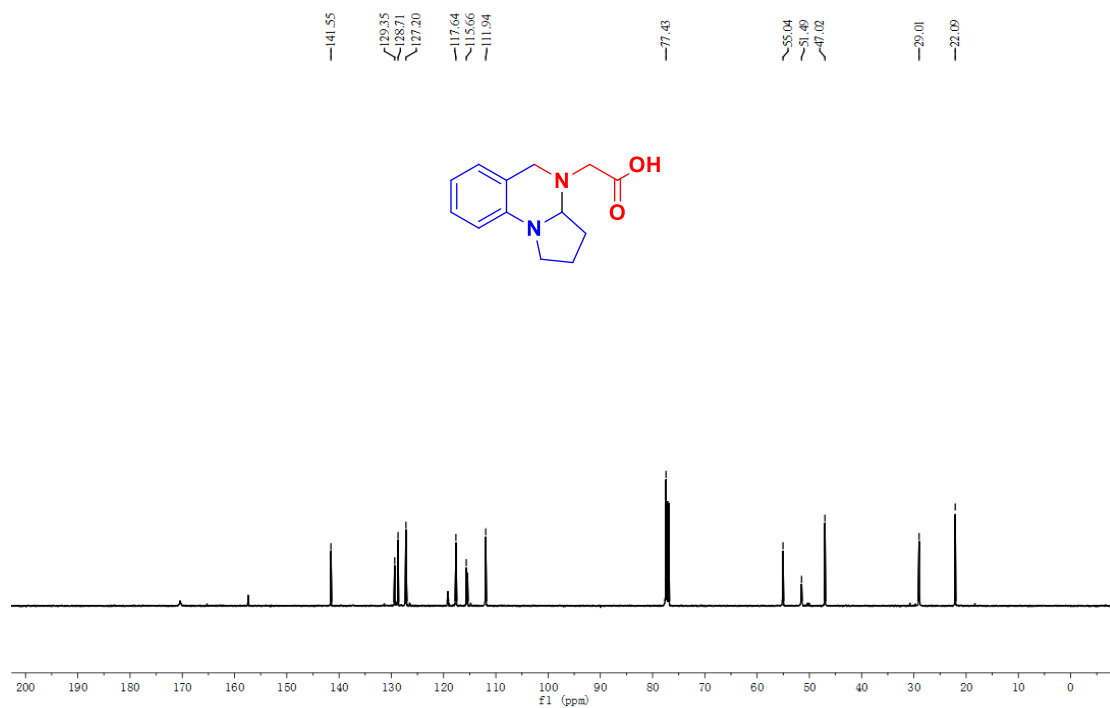

methyl 2-(1,2,3,3a-tetrahydropyrrolo[1,2-a]quinazolin-4(5H)-yl)acetate (7a)

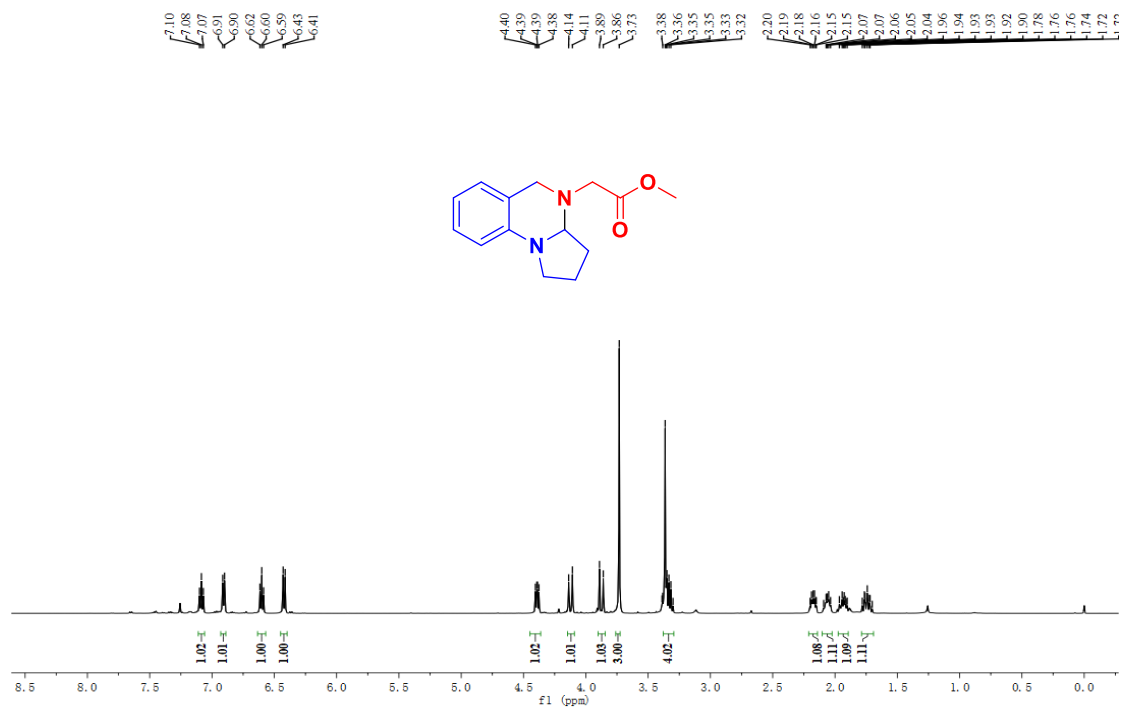

171.48, 143.17, 127.87, 126.67, 118.29, 116.06, 110.56, 76.91, 55.81, 51.03, 51.90, 46.35, 30.43, 22.25

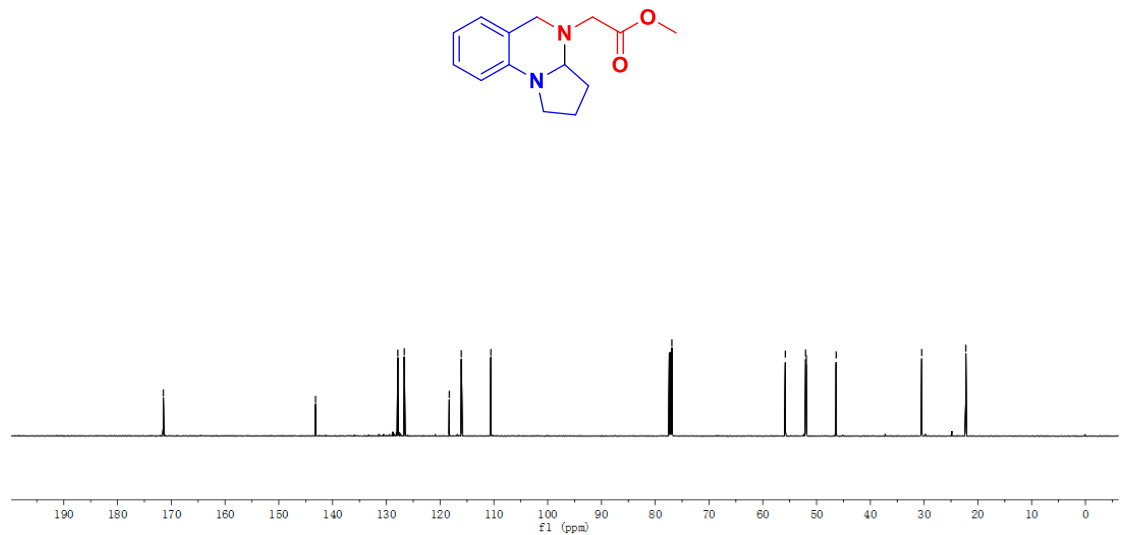

ethyl-(1,2,3,3a-tetrahydropyrrolo[1,2-a]quinazolin-4(5H)-yl)acetate (7b)

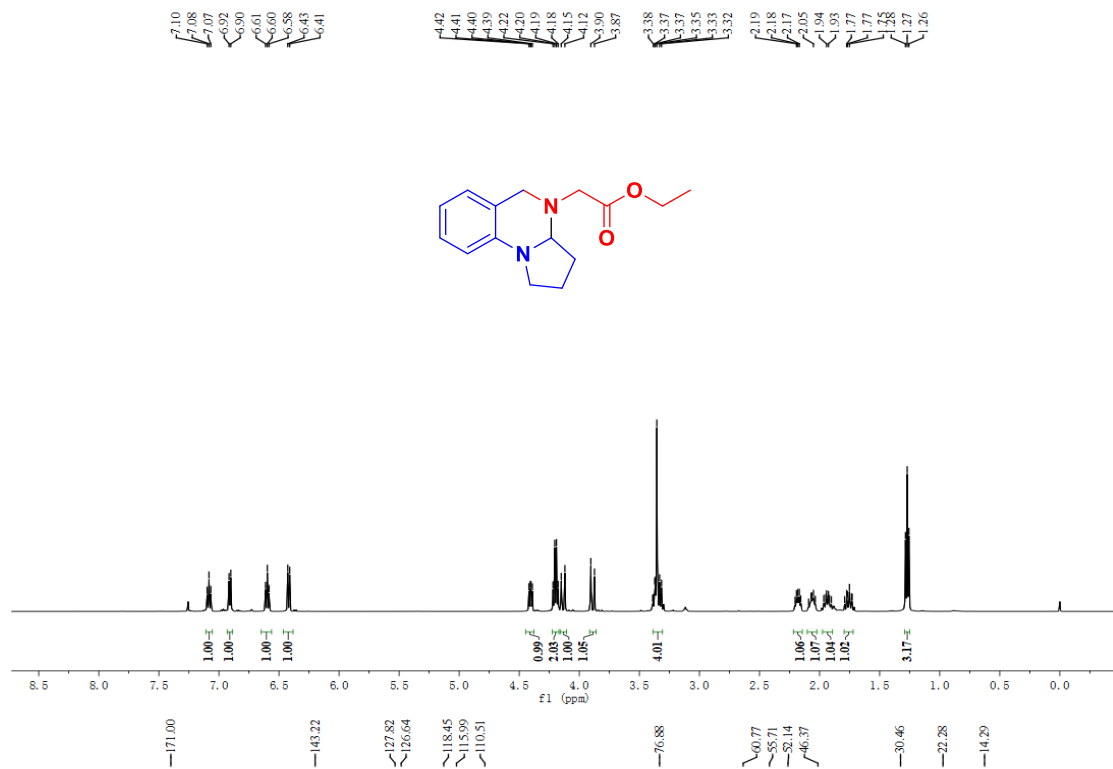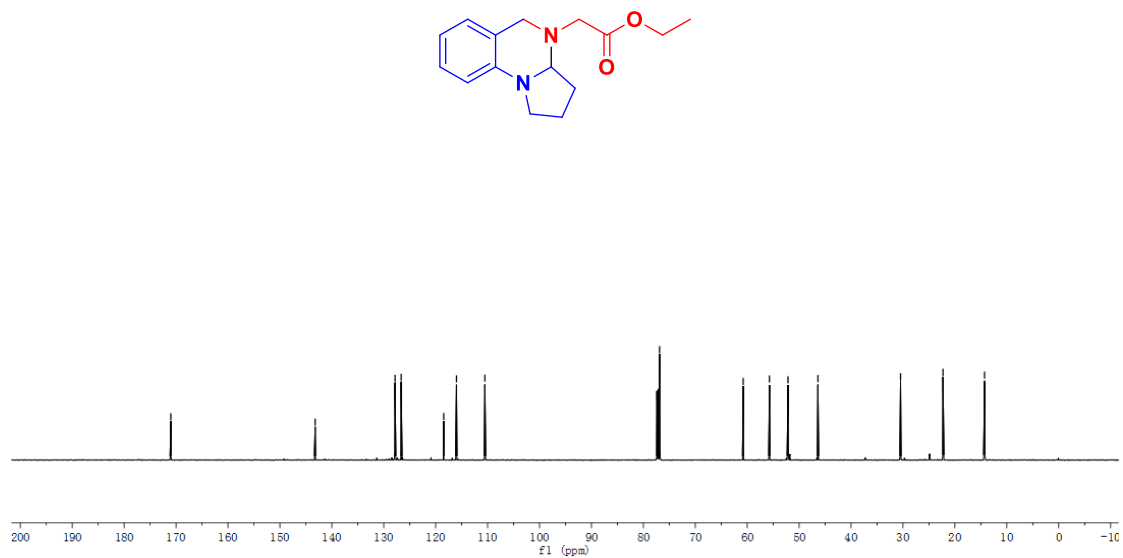





tert-butyl 2-(1,2,3,3a-tetrahydropyrrolo[1,2-a]quinazolin-4(5H)-yl)acetate (7d)

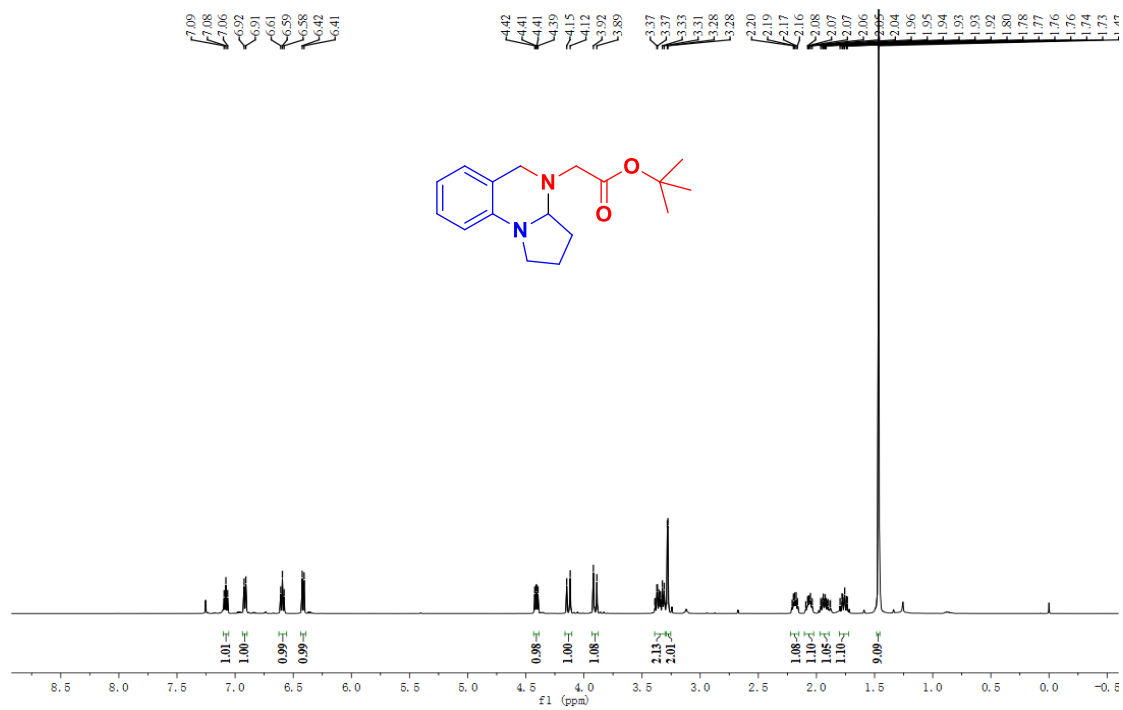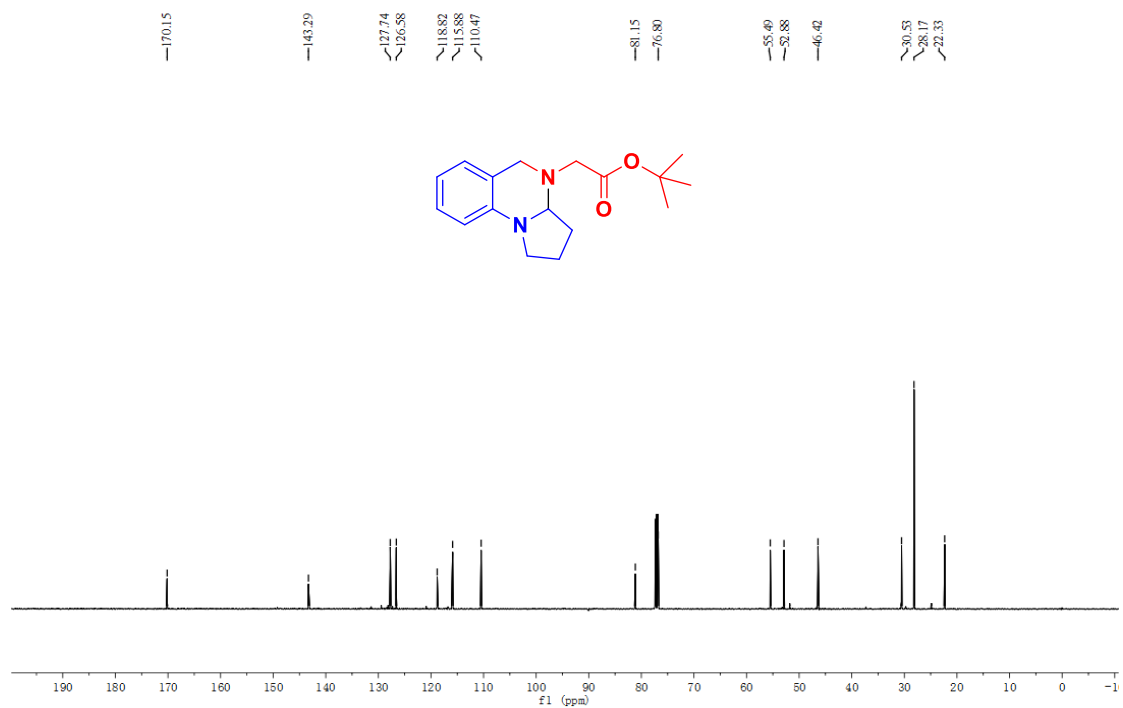

ethyl 2-(8-(trifluoromethyl)-1,2,3,3a-tetrahydropyrrolo[1,2-a]quinazolin-4(5H)-yl)acetate (7e)

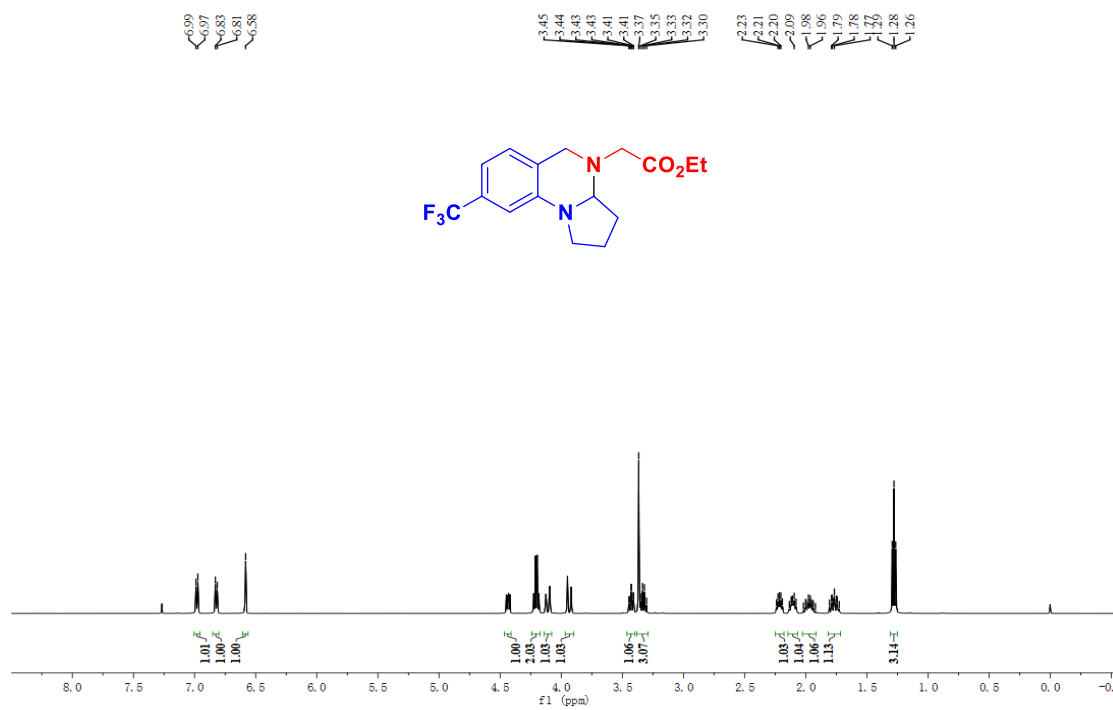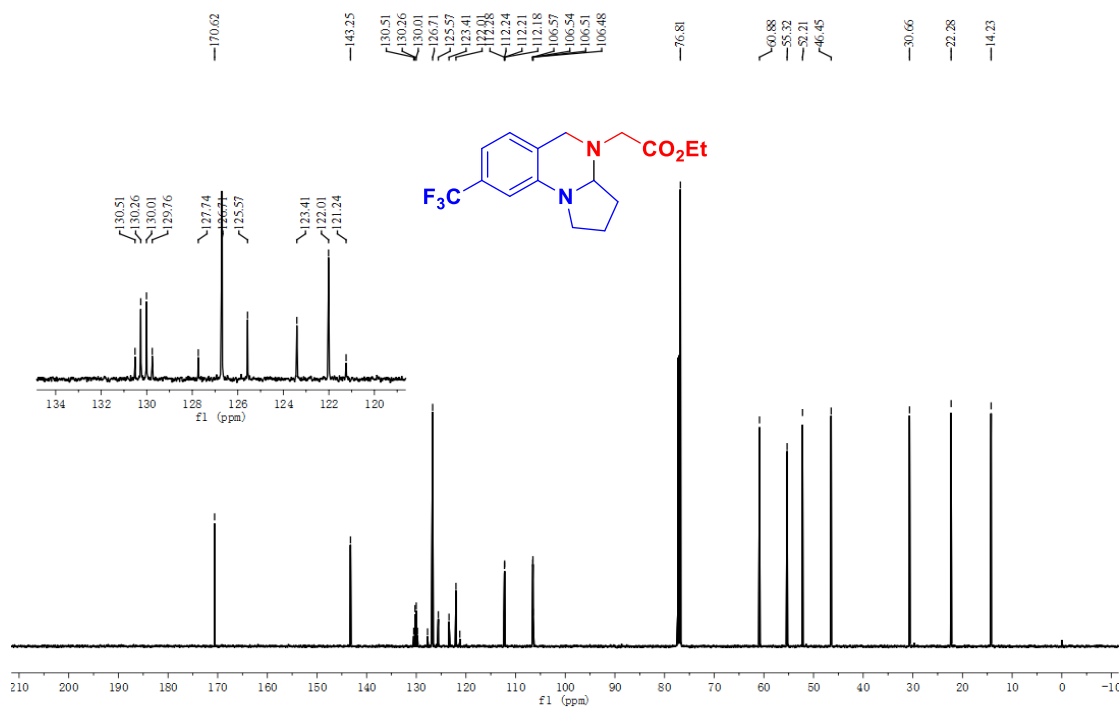

ethyl 2-(8-methyl-1,2,3,3a-tetrahydropyrrolo[1,2-a]quinazolin-4(5H)-yl)acetate (7f)

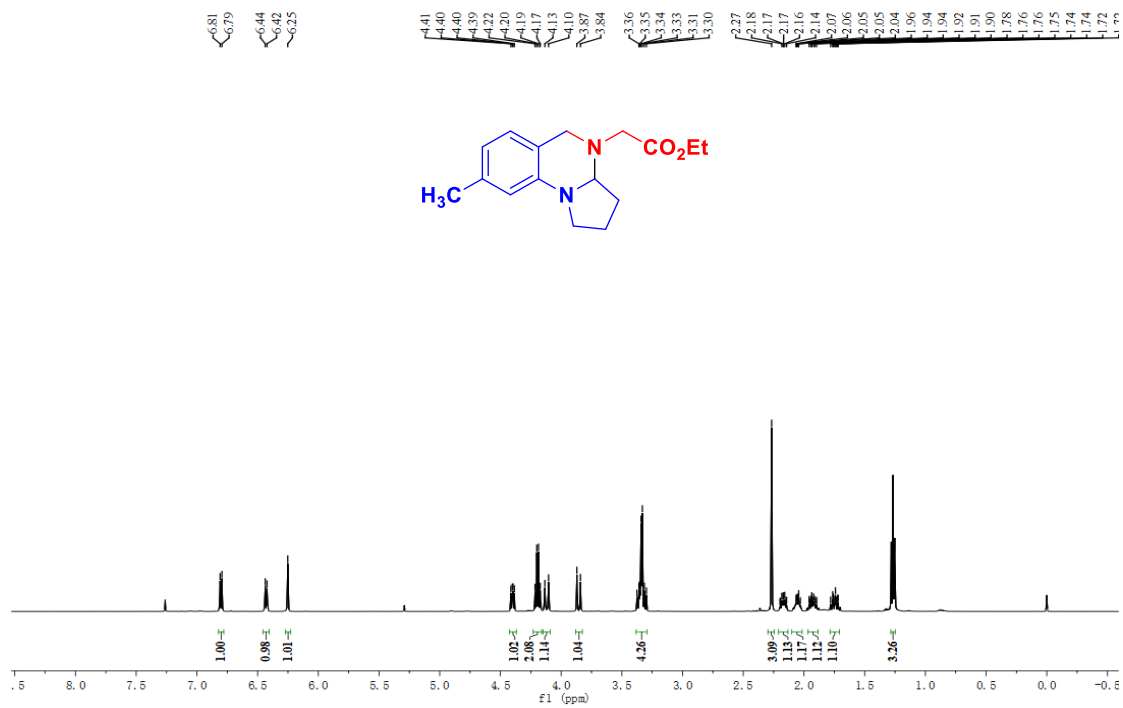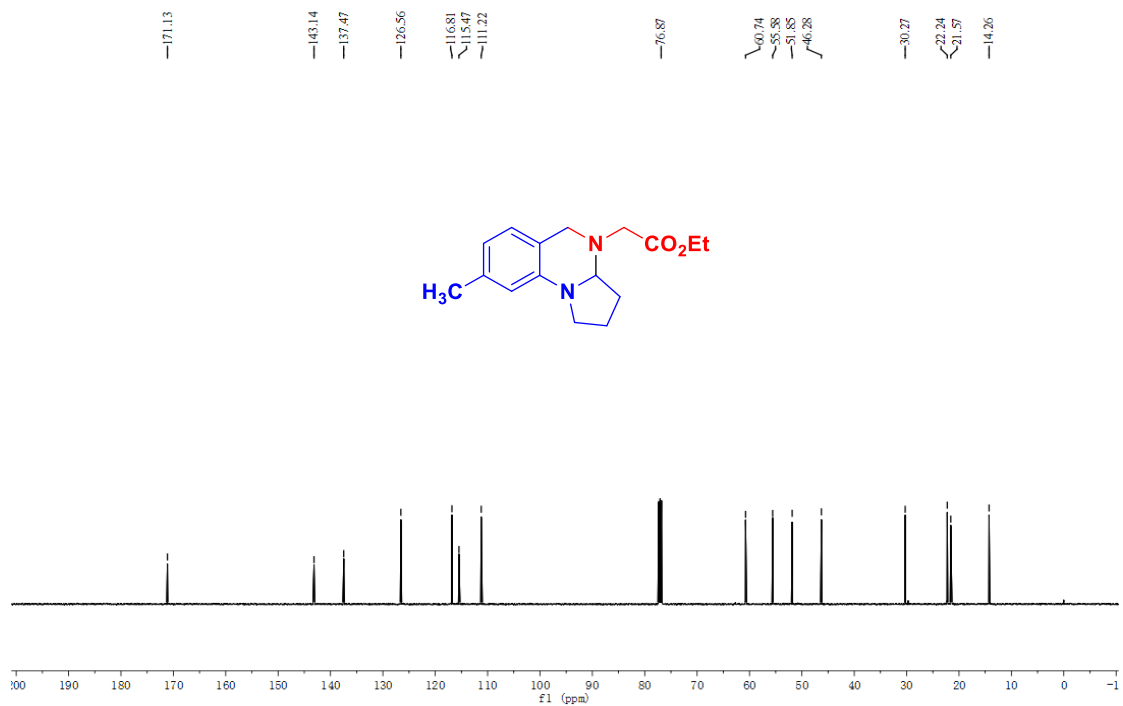

ethyl 2-(7-cyano-1,2,3,3a-tetrahydropyrrolo[1,2-a]quinazolin-4(5H)-yl)acetate (7g)

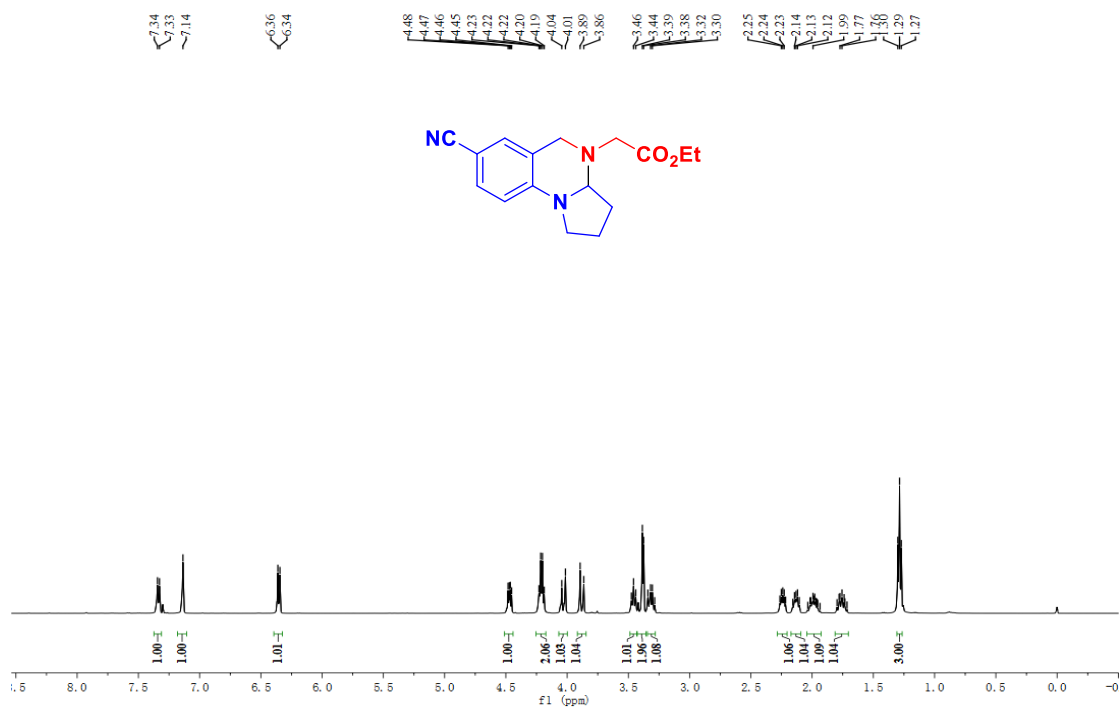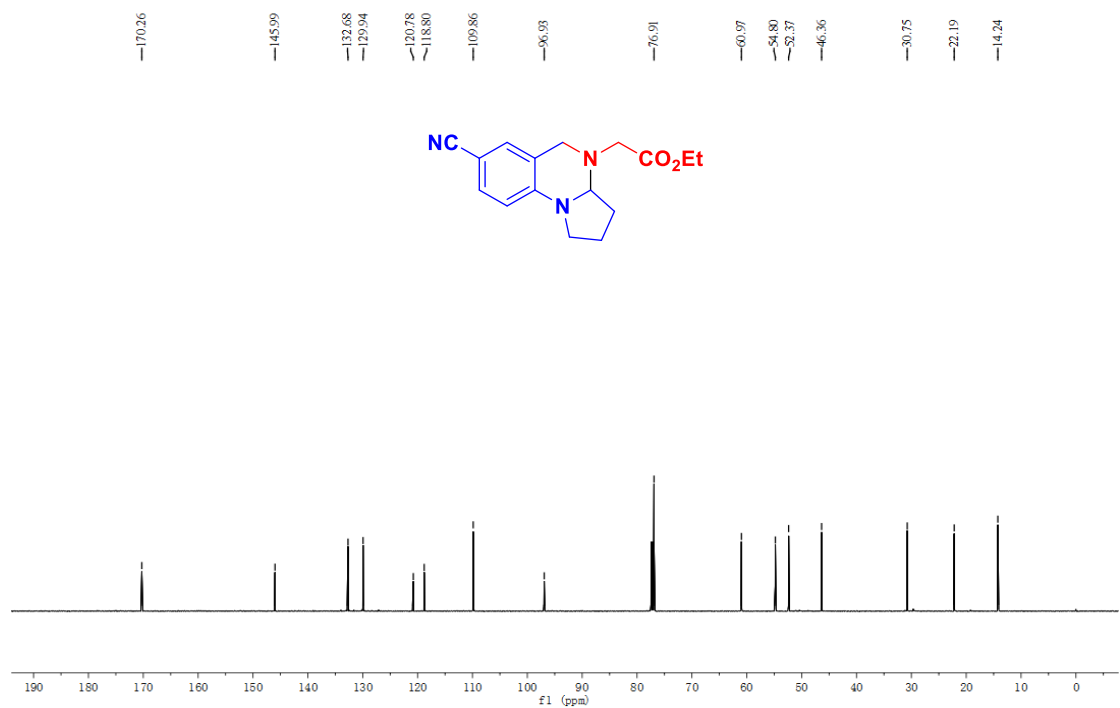



ethyl 2-(6-fluoro-1,2,3,3a-tetrahydropyrrolo[1,2-a]quinazolin-4(5H)-yl)acetate (7i)

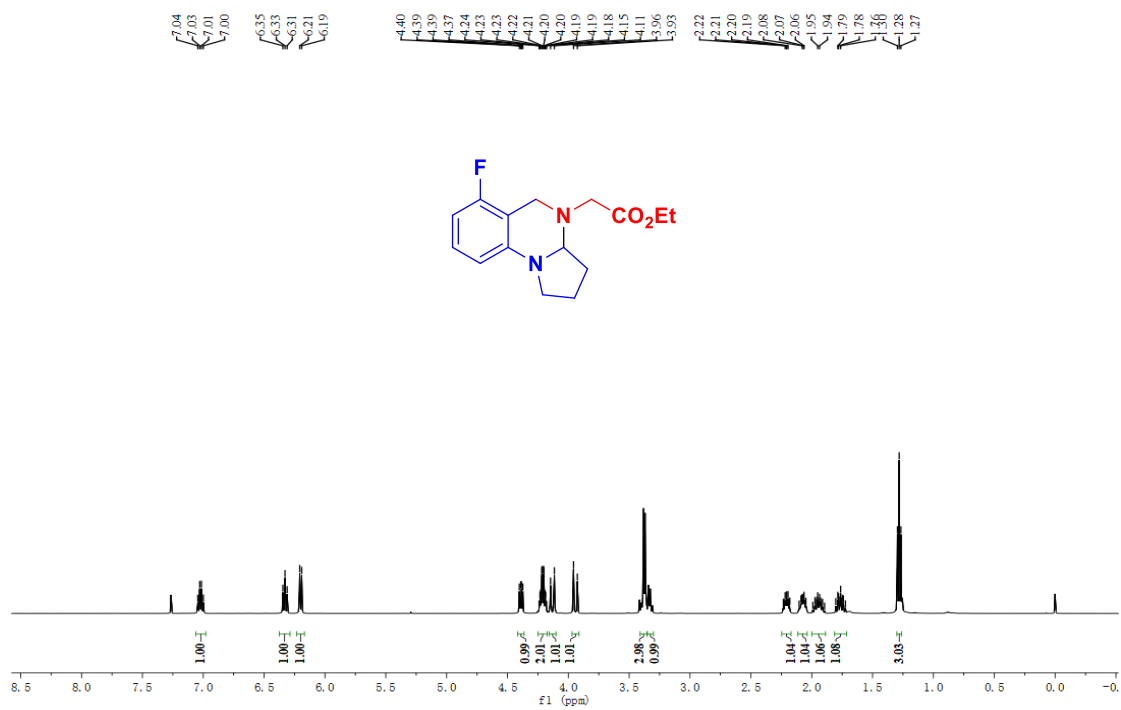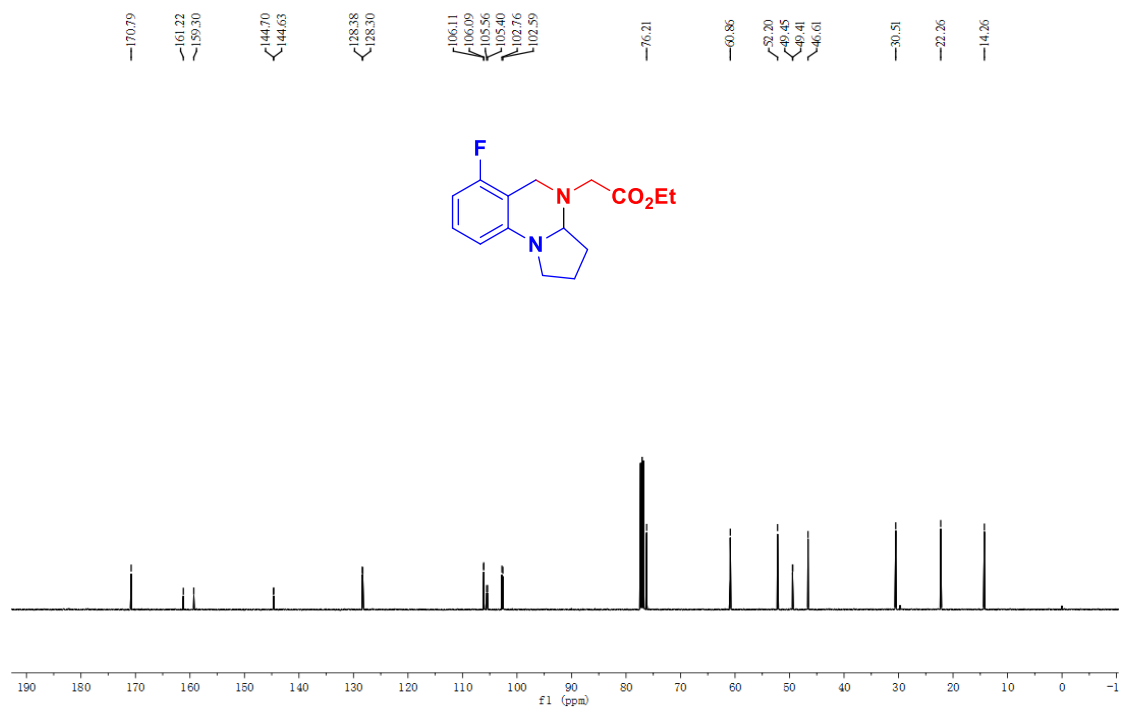

ethyl 2-(6-chloro-1,2,3,3a-tetrahydropyrrolo[1,2-a]quinazolin-4(5H)-yl)acetate (7j)

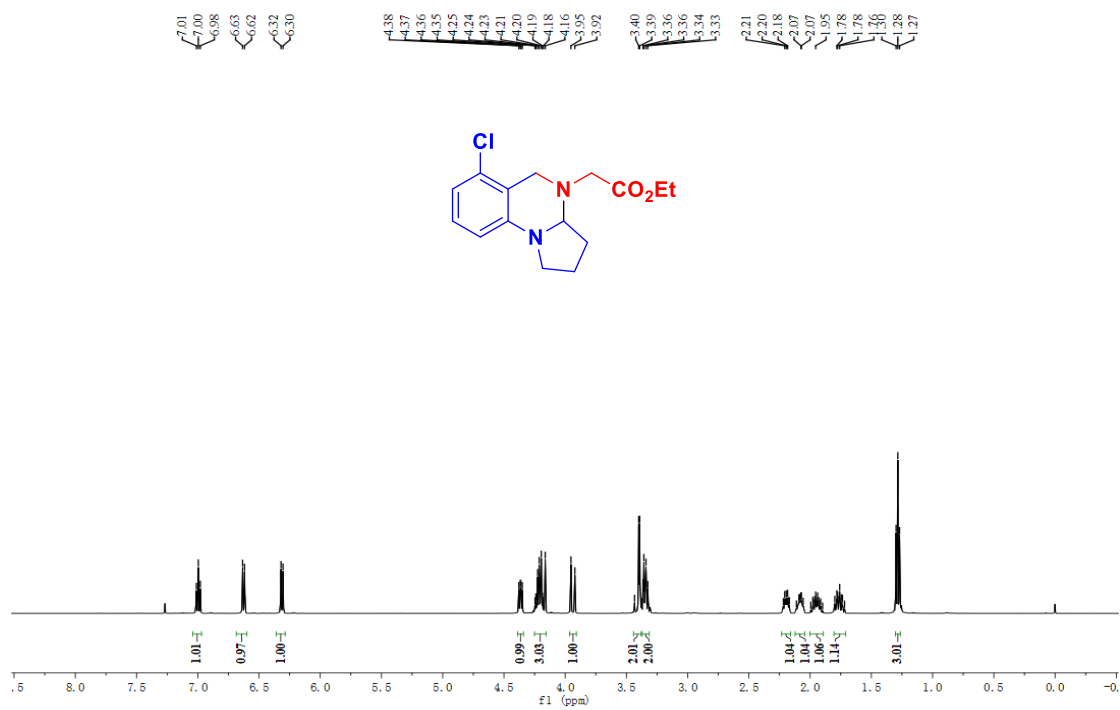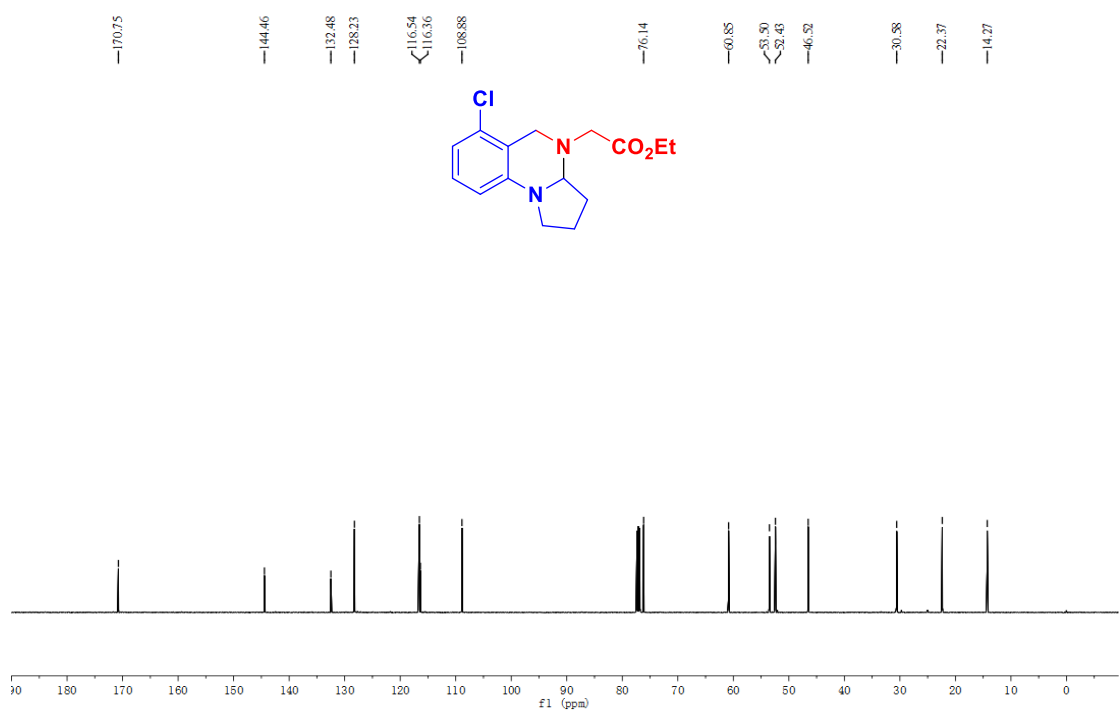

ethyl 2-(6-bromo-1,2,3,3a-tetrahydropyrrolo[1,2-a]quinazolin-4(5H)-yl)acetate (7k)

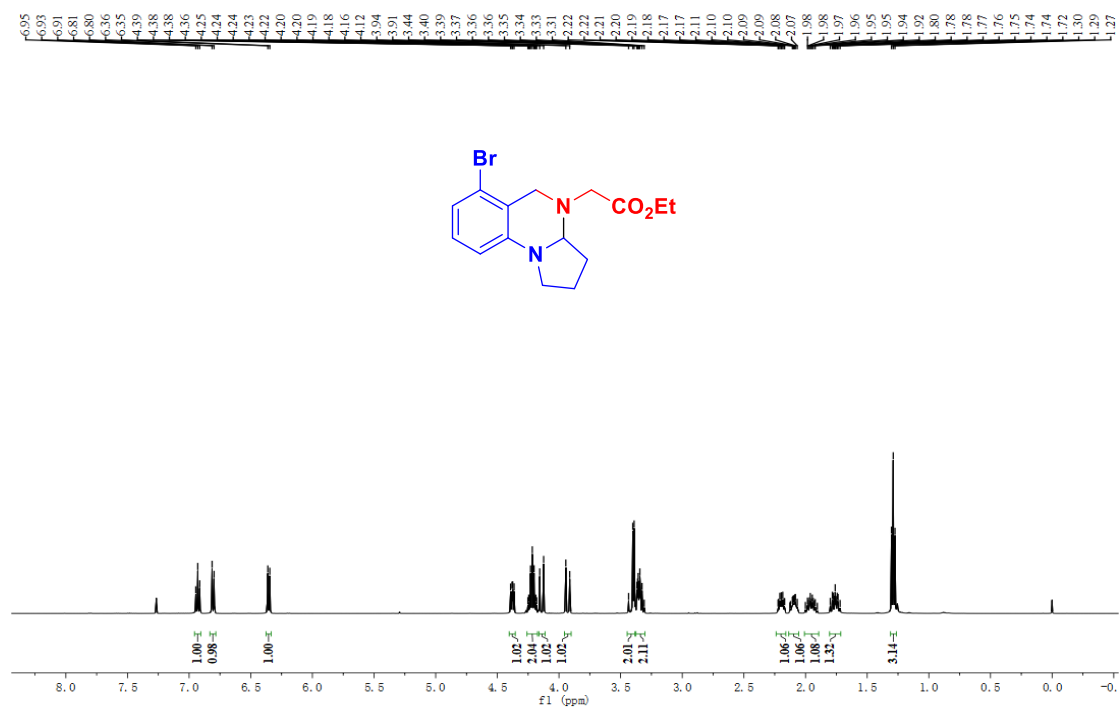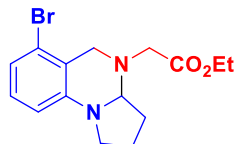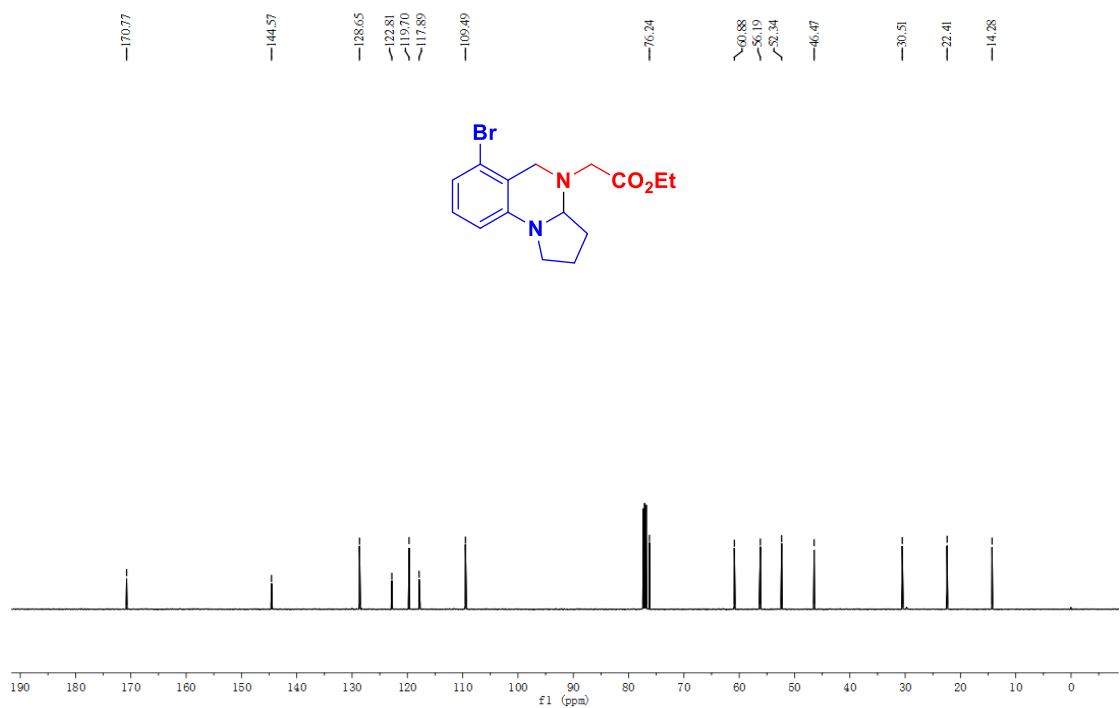



ethyl 6-amino-5,6,6a,6b,7,8,9,10,10a,11-decahydroisoindolo[2,1-a]quinoline-6-carboxylate (7l)

7.11  
7.09  
7.08  
6.94  
6.90  
6.89  
6.88  
6.86  
6.75  
6.69  
6.58  
6.56  
6.55  
6.53  
6.52  
6.51  
6.47  
6.46  
6.45  
6.44  
6.42  
6.19  
6.18  
6.16  
6.15  
6.14  
6.13  
6.12  
6.11  
6.10  
6.09  
6.08  
6.07  
6.06  
6.05  
6.04  
6.03  
6.02  
6.01  
6.00  
5.99  
5.98  
5.97  
5.96  
5.95  
5.94  
5.93  
5.92  
5.91  
5.90  
5.89  
5.88  
5.87  
5.86  
5.85  
5.84  
5.83  
5.82  
5.81  
5.80  
5.79  
5.78  
5.77  
5.76  
5.75  
5.74  
5.73  
5.72  
5.71  
5.70  
5.69  
5.68  
5.67  
5.66  
5.65  
5.64  
5.63  
5.62  
5.61  
5.60  
5.59  
5.58  
5.57  
5.56  
5.55  
5.54  
5.53  
5.52  
5.51  
5.50  
5.49  
5.48  
5.47  
5.46  
5.45  
5.44  
5.43  
5.42  
5.41  
5.40  
5.39  
5.38  
5.37  
5.36  
5.35  
5.34  
5.33  
5.32  
5.31  
5.30  
5.29  
5.28  
5.27  
5.26  
5.25  
5.24  
5.23  
5.22  
5.21  
5.20  
5.19  
5.18  
5.17  
5.16  
5.15  
5.14  
5.13  
5.12  
5.11  
5.10  
5.09  
5.08  
5.07  
5.06  
5.05  
5.04  
5.03  
5.02  
5.01  
5.00  
4.99  
4.98  
4.97  
4.96  
4.95  
4.94  
4.93  
4.92  
4.91  
4.90  
4.89  
4.88  
4.87  
4.86  
4.85  
4.84  
4.83  
4.82  
4.81  
4.80  
4.79  
4.78  
4.77  
4.76  
4.75  
4.74  
4.73  
4.72  
4.71  
4.70  
4.69  
4.68  
4.67  
4.66  
4.65  
4.64  
4.63  
4.62  
4.61  
4.60  
4.59  
4.58  
4.57  
4.56  
4.55  
4.54  
4.53  
4.52  
4.51  
4.50  
4.49  
4.48  
4.47  
4.46  
4.45  
4.44  
4.43  
4.42  
4.41  
4.40  
4.39  
4.38  
4.37  
4.36  
4.35  
4.34  
4.33  
4.32  
4.31  
4.30  
4.29  
4.28  
4.27  
4.26  
4.25  
4.24  
4.23  
4.22  
4.21  
4.20  
4.19  
4.18  
4.17  
4.16  
4.15  
4.14  
4.13  
4.12  
4.11  
4.10  
4.09  
4.08  
4.07  
4.06  
4.05  
4.04  
4.03  
4.02  
4.01  
4.00  
3.99  
3.98  
3.97  
3.96  
3.95  
3.94  
3.93  
3.92  
3.91  
3.90  
3.89  
3.88  
3.87  
3.86  
3.85  
3.84  
3.83  
3.82  
3.81  
3.80  
3.79  
3.78  
3.77  
3.76  
3.75  
3.74  
3.73  
3.72  
3.71  
3.70  
3.69  
3.68  
3.67  
3.66  
3.65  
3.64  
3.63  
3.62  
3.61  
3.60  
3.59  
3.58  
3.57  
3.56  
3.55  
3.54  
3.53  
3.52  
3.51  
3.50  
3.49  
3.48  
3.47  
3.46  
3.45  
3.44  
3.43  
3.42  
3.41  
3.40  
3.39  
3.38  
3.37  
3.36  
3.35  
3.34  
3.33  
3.32  
3.31  
3.30  
3.29  
3.28  
3.27  
3.26  
3.25  
3.24  
3.23  
3.22  
3.21  
3.20  
3.19  
3.18  
3.17  
3.16  
3.15  
3.14  
3.13  
3.12  
3.11  
3.10  
3.09  
3.08  
3.07  
3.06  
3.05  
3.04  
3.03  
3.02  
3.01  
3.00  
2.99  
2.98  
2.97  
2.96  
2.95  
2.94  
2.93  
2.92  
2.91  
2.90  
2.89  
2.88  
2.87  
2.86  
2.85  
2.84  
2.83  
2.82  
2.81  
2.80  
2.79  
2.78  
2.77  
2.76  
2.75  
2.74  
2.73  
2.72  
2.71  
2.70  
2.69  
2.68  
2.67  
2.66  
2.65  
2.64  
2.63  
2.62  
2.61  
2.60  
2.59  
2.58  
2.57  
2.56  
2.55  
2.54  
2.53  
2.52  
2.51  
2.50  
2.49  
2.48  
2.47  
2.46  
2.45  
2.44  
2.43  
2.42  
2.41  
2.40  
2.39  
2.38  
2.37  
2.36  
2.35  
2.34  
2.33  
2.32  
2.31  
2.30  
2.29  
2.28  
2.27  
2.26  
2.25  
2.24  
2.23  
2.22  
2.21  
2.20  
2.19  
2.18  
2.17  
2.16  
2.15  
2.14  
2.13  
2.12  
2.11  
2.10  
2.09  
2.08  
2.07  
2.06  
2.05  
2.04  
2.03  
2.02  
2.01  
2.00  
1.99  
1.98  
1.97  
1.96  
1.95  
1.94  
1.93  
1.92  
1.91  
1.90  
1.89  
1.88  
1.87  
1.86  
1.85  
1.84  
1.83  
1.82  
1.81  
1.80  
1.79  
1.78  
1.77  
1.76  
1.75  
1.74  
1.73  
1.72  
1.71  
1.70  
1.69  
1.68  
1.67  
1.66  
1.65  
1.64  
1.63  
1.62  
1.61  
1.60  
1.59  
1.58  
1.57  
1.56  
1.55  
1.54  
1.53  
1.52  
1.51  
1.50  
1.49  
1.48  
1.47  
1.46  
1.45  
1.44  
1.43  
1.42  
1.41  
1.40  
1.39  
1.38  
1.37  
1.36  
1.35  
1.34  
1.33  
1.32  
1.31  
1.30  
1.29  
1.28  
1.27  
1.26  
1.25  
1.24  
1.23

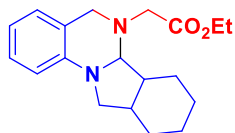

dr 7:1

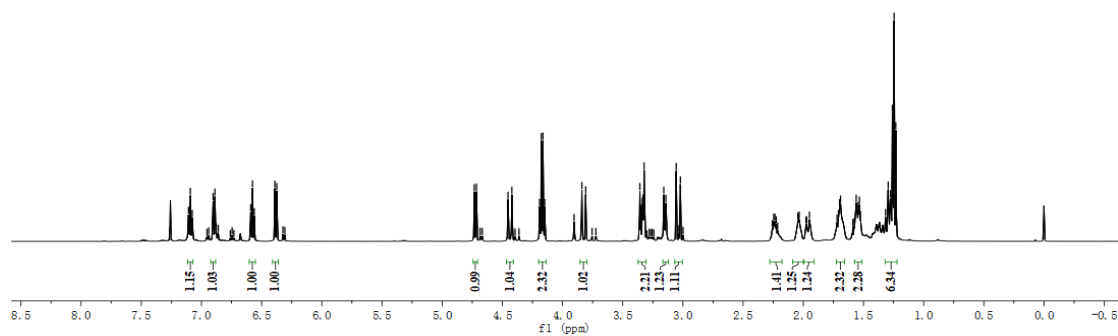

171.84  
143.68  
127.97  
127.13  
116.90  
115.47  
109.53  
60.77  
59.53  
52.63  
49.49  
39.67  
37.44  
36.03  
28.95  
24.89  
24.15  
21.82  
14.25

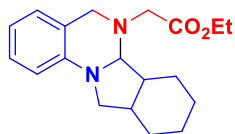

dr 7:1

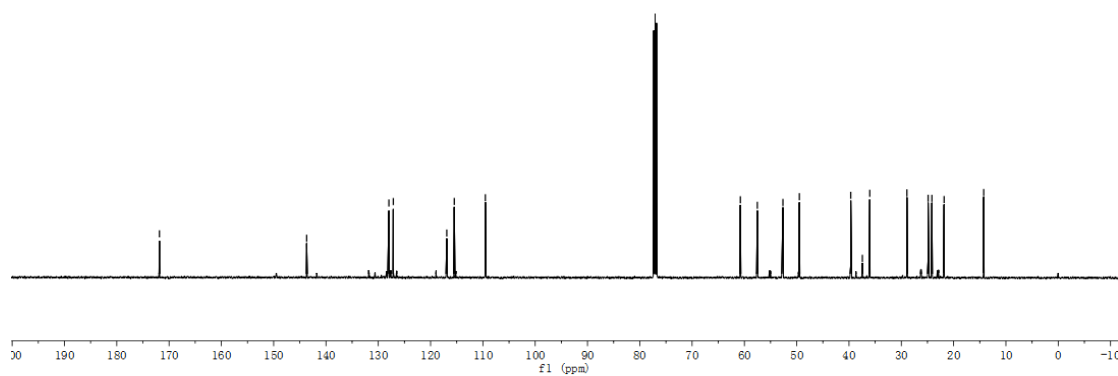

ethyl 2-(7,11b,12,13-tetrahydro-6H-isoquinolino[2,1-a]quinolin-12-yl)acetate (7m)

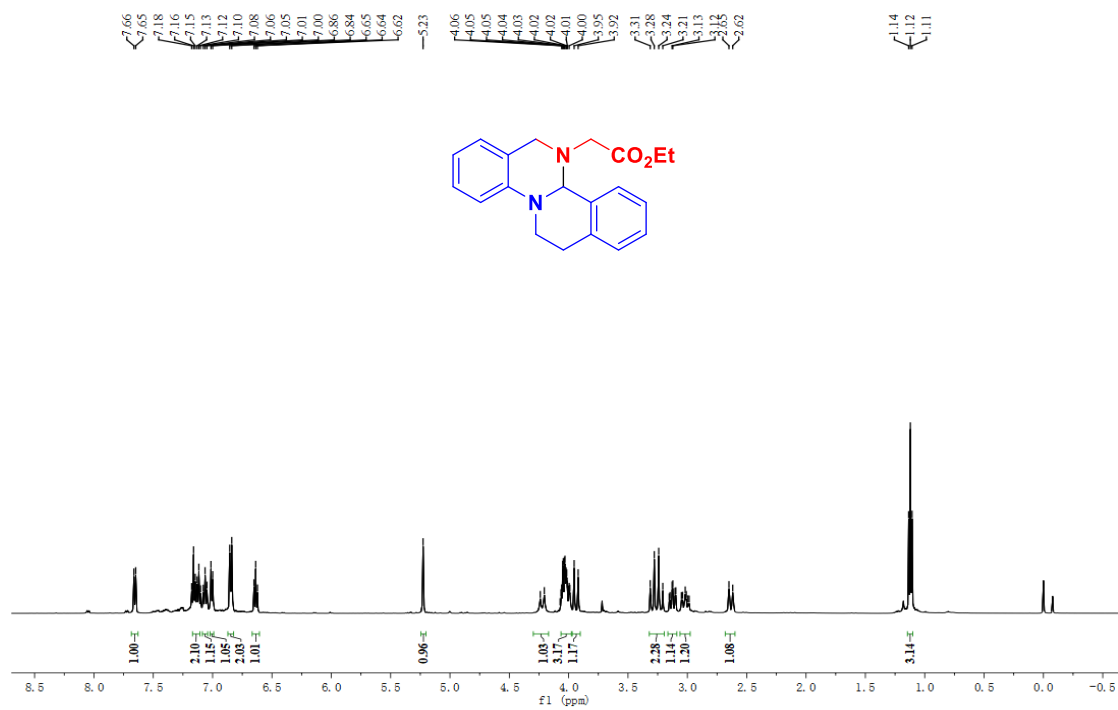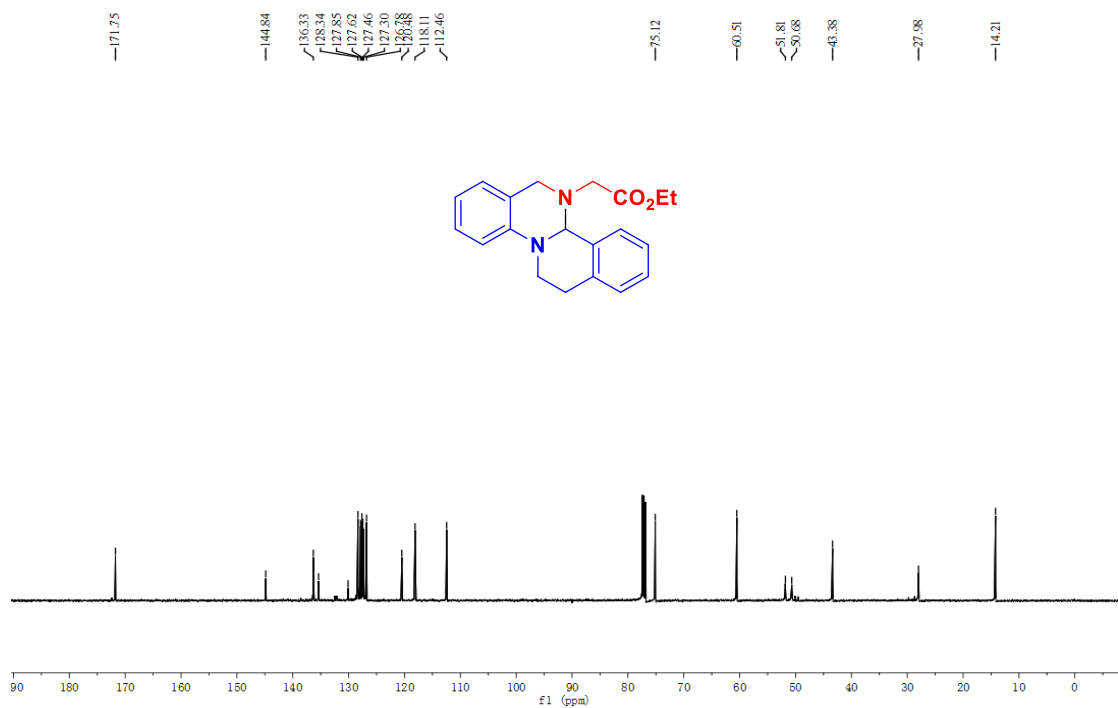

ethyl 2-(6a,7,8,9,10,11-hexahydroazepino[1,2-a]quinazolin-6(5H)-yl)acetate (7n)

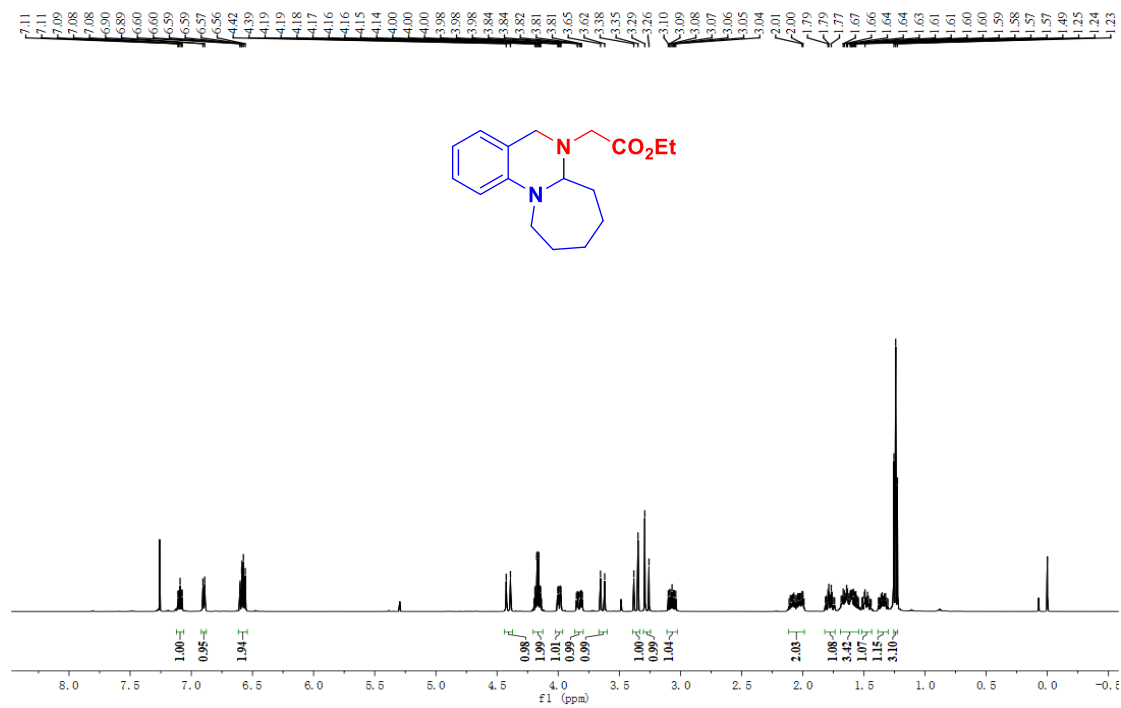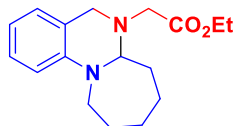

Chemical shifts (ppm): 171.39, 142.45, 127.77, 127.32, 116.10, 115.31, 109.37, 77.85, 60.62, 55.45, 48.40, 47.08, 35.56, 26.31, 26.26, 24.79, 14.22.

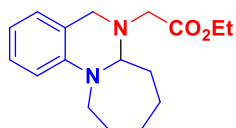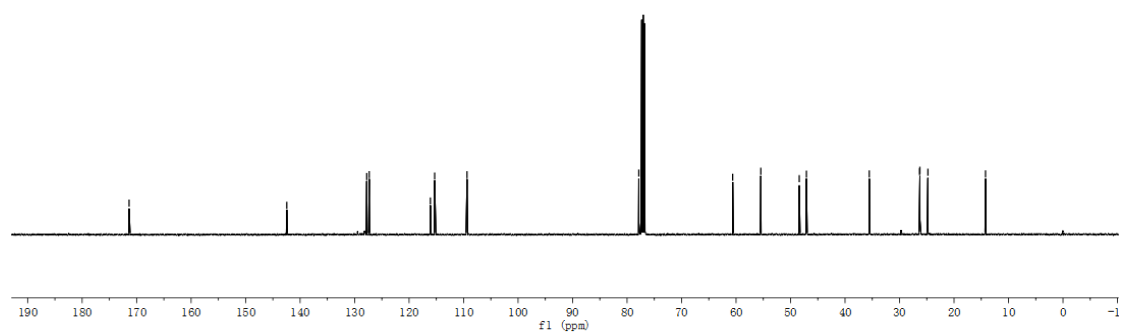

ethyl 6-amino-5,6,6a,7,8,9-hexahydropyrrolo[1,2-a][1,8]naphthyridine-6-carboxylate (7o)

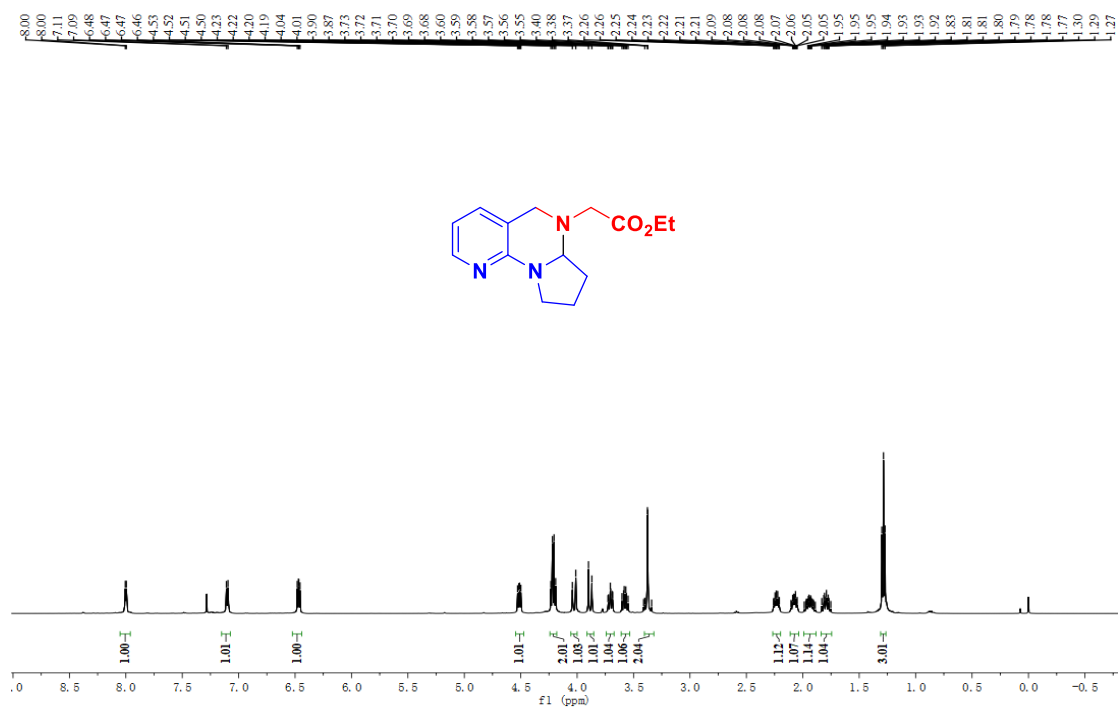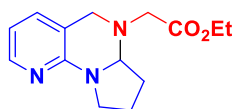

Chemical shifts (ppm): 170.53, 153.65, 146.88, 133.22, 114.10, 111.61, 76.94, 60.50, 54.94, 52.23, 45.53, 31.16, 22.31, 14.24.

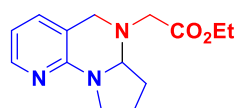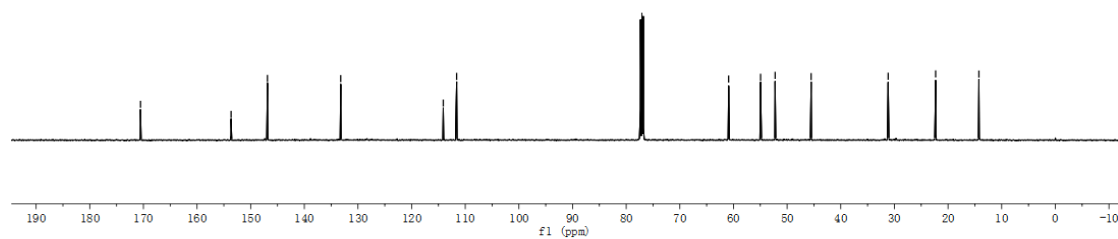

### 3. Determination of the Stereochemistry

#### Chromaster 系统管理器报告

分析时间与日期: 2018/11/16 00:56:37  
 处理日期与时间: 2019/08/21 20:56:57  
 数据路径: E:\李帅帅\4\DATA\0063\  
 数据处理用方法文件: 200-300氙灯模式-60/40

报告日期与时间: 2019/08/21 21:17:46

系统 (数据采集): Chromaster  
 应用程序 (数据): 4-羟基吗啉  
 样品名: CCQ-7088  
 进样次数: 1 of 1  
 样品注释:

系列: 0063  
 样品瓶编号: 1  
 样品瓶类型: UNK  
 进样量: 10.0 ul

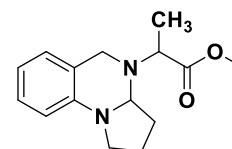

色谱类型: 固定波长色谱, 254 nm

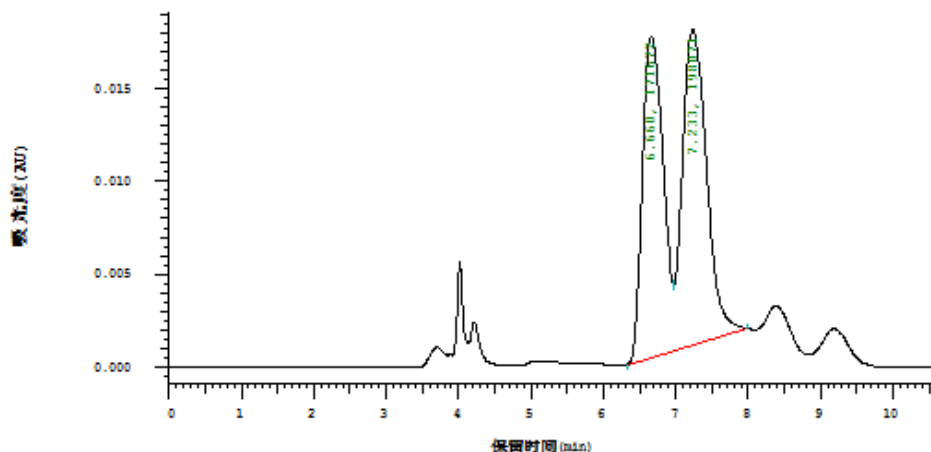

数据处理用方法文件: 200-300氙灯模式-60/40

方法文件的创建者:

泵1: 5110+活塞清洗

泵1溶剂A: 正己烷

泵1溶剂C:

方法文件的注释:

泵1溶剂B: 异丙醇

泵1溶剂D:

色谱类型: 固定波长色谱, 254 nm

峰的定量: 面积  
 计算方法: 面积%

| No. | RT    | 面积     | 面积%     |
|-----|-------|--------|---------|
| 1   | 6.660 | 171672 | 46.430  |
| 2   | 7.233 | 198071 | 53.570  |
|     |       | 369743 | 100.000 |

判定峰的基准: 0

# Chromaster 系统管理器报告

分析时间与日期:2018/11/16 00:43:13  
 处理日期与时间:2019/08/21 21:00:26  
 数据路径: E:\李帅帅\4\DATA\0062\  
 数据处理用方法文件:200-300氙灯模式-60/40

报告日期与时间:2019/08/21 21:24:18

系统(数据采集): Chromaster  
 应用程序(数据): 4-羟基吡啶  
 样品名: CCQ-7088  
 进样次数: 1 of 1  
 样品注释:

系列: 0062  
 样品瓶编号: 1  
 样品瓶类型: UNK  
 进样量: 10.0 ul

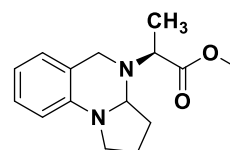

色谱类型: 固定波长色谱, 254 nm

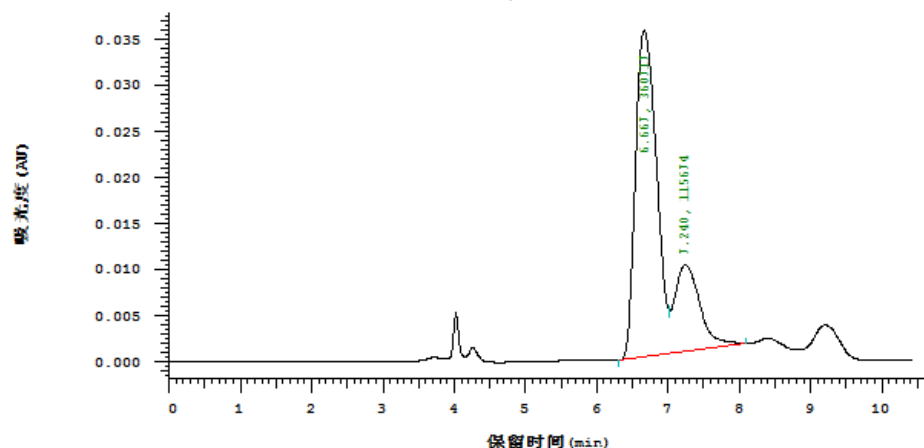

数据处理用方法文件:200-300氙灯模式-60/40  
 方法文件的创建者:  
 泵1: 5110+活塞清洗  
 泵1溶剂A: 正己烷  
 泵1溶剂C:  
 方法文件的注释:

泵1溶剂B: 异丙醇  
 泵1溶剂D:

色谱类型: 固定波长色谱, 254 nm

峰的定量: 面积  
 计算方法: 面积%

| No. | RT    | 面积     | 面积%     |
|-----|-------|--------|---------|
| 1   | 6.667 | 360717 | 75.719  |
| 2   | 7.240 | 115674 | 24.281  |
|     |       | 476391 | 100.000 |

判定峰的基准: 0
